# Supplementary material for: Radiogenomics Consortium Genome-Wide Association Study Meta-Analysis of Late Toxicity After Prostate Cancer Radiotherapy
Source: PubMed Central journal article supplement (PMC7019089; doi:10.1093/jnci/djz075), 2019-05-16
Supplement: djz075_supplementary_data.pdf [file djz075_supplementary_data.pdf]

## Supplementary Methods

### *Study Participants*

RAPPER (UKCRN1471; [1]) recruited participants enrolled in the RT01 (ISRCTN47772397 [2]) and CHHiP (ISRCTN97182923 [3, 4]) trials, and was approved by the Cambridge South Research Ethics Committee (05/Q0108/365). RADIOGEN recruited participants treated at the Clinical University Hospital of Santiago de Compostela, Spain and was approved by the Galician Ethical Committee [5]. Gene-PARE [6, 7] recruited participants treated at the Mount Sinai Hospital and was approved by the Mount Sinai Medical Center Institutional Review Board. UGhent recruited participants from the Ghent University Hospital [8] and was approved by the Ghent University Hospital ethics committee. CCI-BT and CCI-EBRT [9] were recruited from the Cross Cancer Institute and the Tom Baker Cancer Centre in Canada following approval by the Health Research Ethics Board of Alberta. PRRG participants were recruited at the Hospital of the National Institute of Radiological Sciences and received either external beam photon therapy (PRRG-photon) or carbon-ion therapy (PRRG-Cion). All the patients provided written informed consent to participate in the study between 2001 and 2010, which was approved by the Certified Review Board at the National Institute of Radiological Sciences (06-004) and by each collaborating institution (Tohoku University Hospital, Yokohama City University Hospital, Nagoya City University Hospital and Kyushu University Hospital). NTMC participants were recruited from the National Tokyo Medical Center and were treated with permanent seed brachytherapy with or without external beam photon therapy. All participants provided informed consent, and the study was approved by the local Institutional Review Board.

### *Assessment of late radiotherapy toxicity*

Toxicity was assessed using the following: the Late Effects in Normal Tissue [10], Royal Marsden Hospital [11], and Radiation Therapy Oncology Group [12] scales (RAPPER); the NCI CTCAE [13] (RADIOGEN, CCI-EBRT, UGhent); and the American Urological Association Symptom Score [14] and an institutional scale (GenePARE). UGhent and CCI-BT used a simple measure of presence or absence for rectal bleeding.

Associations between pairs of toxicities were assessed by hazard ratios, considering each toxicity as a time-dependent covariate in a Cox model for each other toxicity, unadjusted for any other predictor. If the explanatory toxicity was censored before the dependent toxicity, the dependent toxicity was artificially censored at the same earlier time.

### *Genotype Imputation*

Genetic data were imputed using, as reference haplotypes, the 1000 Genomes Project Phase 3 (Haplotype release date October 2014) for chromosomes 1 to 22 and the 1000 Genomes Project Phase 1 (Haplotype ChrX release date Aug 2012) for chromosome X, since the phased data for Chr X from 1000GP Phase 3 was not available. A two-stage procedure used SHAPEIT (shapeit.v2.r790.Ubuntu\_12.04.4.static) to derive phased genotypes (default parameters with the following modifications: 10 burn-in iterations, 10 pruning iterations, and 50 iterations to compute transition probabilities) and IMPUTEv2 (impute\_v2.3.2\_x86\_64\_static) to perform imputation of the phased data (default parameters with the following modifications: 5Mb non-overlapping intervals, 800 reference haplotypes to use as templates when imputing missing genotypes, and 500kb buffer region). 1000 Genomes Project variants whose minor allele frequency in Europeans and East Asians was lower than 0.001 were excluded from imputation. All OncoArray datasets were imputed jointly; the Affymetrix and Illumina CytoSNP12 datasets were imputed separately following the same procedure.

### *Fine-scale mapping*

Genomic regions were defined as the 1Mb interval surrounding each statistically significant independent association. We re-imputed genotypes for the non-directly-genotyped variants using IMPUTE2 [15] and a reference panel [16] using the standard IMPUTE2 MCMC algorithm for follow-up imputation (see [17] for detailed description of the parameters used) to improve accuracy at low frequency variants. Variants with imputation info score  $\geq 0.3$  in all cohorts and MAF  $\geq 0.02$  in at least one cohort were included. 4,190 variants across the chr1:230337180-231337180 region; 3,776 at chr5:156903410\_157903410 and 3,987 at chr9:30366808-31366808 were evaluated for hematuria, rectal bleeding or decreased urinary stream risk, respectively.

For each cohort, we ran grouped relative risk models independently and meta-analyzed the results, using a fixed-effects meta-analysis (*meta*, [https://mathgen.stats.ox.ac.uk/genetics\\_software/meta/meta.html](https://mathgen.stats.ox.ac.uk/genetics_software/meta/meta.html)). Then, the most statistically significant variant (index variant at signal 1) was used to perform conditional analysis in each cohort independently. To define the cumulative posterior probability of the credible set, we estimated the empirical Bayes Factor [18].

The conditional results were meta-analyzed and the most significant variant (index variant at signal 2) selected. This loop continued until no variants at p-values of  $10^{-4}$  remained at the region. A preliminary set of credible causal variants (CCVs) was then determined among the variants within two orders of magnitude from the index variant for each signal. The most significant variant (final index variant) within the set was identified by adjusting the effect of each signal by the additional signals. The final credible set was redefined among the variants with p-values within two orders of magnitude smaller than the index variant after being conditioned by the additional index variants at the region.

For each variant (i) we normalized its effect size ( $\hat{\beta}_i$ ) and variance ( $\sigma_i$ ) by its allele frequency ( $p_i$ ) as follows

$$\begin{aligned}\beta_{Ni} &= \hat{\beta}_i \sqrt{2p_i(1-p_i)} \\ \sigma_{Ni}^2 &= \sigma_i^2 2p_i(1-p_i)\end{aligned}$$

where  $p_i$  is the allele frequency for variant i in the OncoArray cohort, and estimated the prior variance ( $\omega$ ) using (Spencer et al., 2016) approach with normalized betas and normalized variance

$$\omega_N = \widehat{\beta_{N130}^2} - \sigma_{Nm}^2$$

We then estimated the cumulative posterior probability of the variants included in the credible set. For regions with more than one independent signal Bayes Factor was estimated using the summary statistics from the conditional analysis, after adjusting for other index variants at the region.

#### *Credible causal variant (CCV) annotation*

Variants were annotated with Variant Effect Predictor [19] to determine their effect on genes, transcripts, and protein sequences. To evaluate whether CCVs were located at regulatory regions, we overlapped our CCVs with Encode enhancer-like and promoter-like regions for 73 tissues and cells (primary, immortalized, *in vitro* differentiated) with available data for both enhancer- and promoter-like regions ([19-21]

and DCC accession: ENCSR037HRJ; GEO accession: GSE30567). In order to evaluate whether the CCVs could drive the expression of local genes, we accessed the GTEx Portal on 04/19/2018 to retrieve the metasoft results for all tissues in the V7 release. LocusZoom [22] was used to visualize associations for regions containing CCVs. Linkage disequilibrium was estimated using as reference the European ancestry populations from the 1000 Genomes Project (Phase 3, release 20130502; [16]).

### *Pathway Analysis*

Gene- and pathway-based analysis was performed using *Pascal* (Pathway scoring algorithm) [23]. Gene-based scores were computed using the default “sum” option, which calculates the sum of chi-squared statistics and measures the strongest association signal per gene, respectively. SNPs were mapped to genes using a 100kb window surrounding each gene. Pathway-based scores are computed using a modified Fisher method, which improves statistical power compared with enrichment-based analysis while maintaining rigorous type I error control. The KEGG, Biocarta, and Reactome databases were queried for the pathway-based analysis.

### *Multivariable Modeling*

Clinical variables were combined with genetic variants (identified via GWAS meta-analysis and from prior studies) using cohort-stratified grouped relative risk models, assuming an additive model for each variant, resulting in per allele hazard ratios (HR). Such grouped relative risk models estimate hazard ratios based on grouped survival data, assuming proportional hazards for the latent continuous survival times within each cohort stratum. The discrete monitoring times need not be equally spaced, nor need they be the same across cohort strata, but it is necessary that they be on the same temporal grid for all subjects within each cohort stratum. Confidence intervals and p-values were likelihood based and two-sided, with p-values  $\leq 0.05$  considered statistically significant.

Stepwise model selection was used to identify a parsimonious multivariable model for each toxicity outcome. For the multivariable cohort-stratified grouped relative risk models presented in Table 4, an alpha to enter of 0.10 and an alpha to stay of 0.05 were used as model selection parameters. Genetic variants were forced into the model in advance of the inclusion of any clinical variables. The large number of tied follow-up

times were handled using the exact method, equivalent to marginal likelihood (that Efron's method approximates) –not the discrete time method that assumes proportional odds rather than proportional hazards. The  $\log_2$  transformation was used to symmetrize the distribution of strongly positively skewed continuous variables, thus reducing the influence of the most extreme observed covariate values and resulting in a hazard ratio per doubling of the predictor. The functional form of each continuous variable was chosen via model selection from the following options: linear; piecewise constant histospline with knots at one or more quartiles; or piecewise linear spline with knots at one or more quartiles, with the option to force the slope to be 0 to the left of the first knot (as a reference group, similar to that of a histospline).

Missing data were imputed within cohorts as follows. If a variable had  $\leq 25\%$  of values missing within a cohort, within-cohort mean imputation was used to impute the missing values. If a variable had  $>25\%$  of values missing within a cohort, the variable was set to a constant of 0 within the cohort, allowing the hazard ratio for that variable to be estimated based only on cohorts with no more than 25% missing data, without requiring subjects missing data on a subset of variables within some cohorts to be excluded entirely from the analysis. This novel approach allowed us to at least partially adjust for variables that were available in some cohorts but not others, where the adjustment would be complete for variables that truly did not vary within cohorts in which they were missing –irrespective of the true constant value within each such cohort.

In addition to grouped relative risk regression, two other multivariable modeling methods were applied to derive separate predictive models for each of the four toxicity endpoints: Polygenic Risk Score (PRS) and a machine-learning method. In both methods, a “training” set was used to derive the model and a “test” set was used to evaluate model performance such that the training set was independent of the test set. The training set included a randomly selected 50% of the RAPPER study participants and all other cohorts; the testing set included the 50% of the RAPPER study participants not included in training data.

The first method, PRS, is a linear combination of risks of multiple SNPs identified by GWAS. The risk SNPs comprising the PRS were identified via GWAS meta-analysis of results from the cohorts comprising the training set for each of the four toxicity endpoints (rectal bleeding, increased urinary frequency, decreased urinary stream, and hematuria). On the training data, we tested several  $P_{\text{meta}}$  thresholds (1E-1, 1E-2, ..., 1E-8) in selecting SNPs for PRS, followed by LD-pruned using 1000 Genomes Project EUR panel. Afterward, we

computed PRS for each individual of the testing data, and examine the association between PRS and toxicity endpoint.

The machine learning-based method, which was previously developed and applied to RNAseq-derived gene expression data [24], was used to derive multi-SNP models for predicting the toxicity outcomes considered in this study. Since this method was designed for binary classification tasks, we focused on the binarized versions of these endpoints (grade 2 or worse toxicity vs. grade 0 or 1 toxicity) in these experiments, as in the GWAS meta-analysis. We applied this method to the training set, with the constituent SNPs filtered at the same thresholds used for PGS, and evaluated the resultant models on the test set.

### *Data Management and Analysis*

Genomic data were formatted using R (version 3.2.2, R Foundation for Statistical Computing, Vienna, Austria). Analysis was carried out using ProbABEL [25], which employs the `coxfit2` function in the R package `survival`. GWAS results were meta-analyzed using Stata (version 14.2, StataCorp LLC, College Station, TX). Multivariable modeling was done using SAS (version 9.4, SAS Institute, Cary, NC). Pascal was used to compute gene and pathway scores [23].

### **References**

1. Burnet NG, Elliott RM, Dunning A, *et al.* Radiosensitivity, radiogenomics and RAPPER. *Clin Oncol (R Coll Radiol)* 2006;18(7):525-8.
2. Sydes MR, Stephens RJ, Moore AR, *et al.* Implementing the UK Medical Research Council (MRC) RT01 trial (ISRCTN 47772397): methods and practicalities of a randomised controlled trial of conformal radiotherapy in men with localised prostate cancer. *Radiother Oncol* 2004;72(2):199-211.
3. Dearnaley D, Syndikus I, Mossop H, *et al.* Conventional versus hypofractionated high-dose intensity-modulated radiotherapy for prostate cancer: 5-year outcomes of the randomised, non-inferiority, phase 3 CHHiP trial. *Lancet Oncol* 2016;17(8):1047-60.

4. Dearnaley D, Syndikus I, Sumo G, *et al.* Conventional versus hypofractionated high-dose intensity-modulated radiotherapy for prostate cancer: preliminary safety results from the CHHiP randomised controlled trial. *Lancet Oncol* 2012;13(1):43-54.
5. Fachal L, Gomez-Caamano A, Barnett GC, *et al.* A three-stage genome-wide association study identifies a susceptibility locus for late radiotherapy toxicity at 2q24.1. *Nat Genet* 2014;46(8):891-4.
6. Ho AY, Atencio DP, Peters S, *et al.* Genetic predictors of adverse radiotherapy effects: the Gene-PARE project. *Int J Radiat Oncol Biol Phys* 2006;65(3):646-55.
7. Kerns SL, Stock R, Stone N, *et al.* A 2-stage genome-wide association study to identify single nucleotide polymorphisms associated with development of erectile dysfunction following radiation therapy for prostate cancer. *Int J Radiat Oncol Biol Phys* 2013;85(1):e21-8.
8. De Meerleer G, Vakaet L, Meersschout S, *et al.* Intensity-modulated radiotherapy as primary treatment for prostate cancer: acute toxicity in 114 patients. *Int J Radiat Oncol Biol Phys* 2004;60(3):777-87.
9. Kerns SL, Dorling L, Fachal L, *et al.* Meta-analysis of Genome Wide Association Studies Identifies Genetic Markers of Late Toxicity Following Radiotherapy for Prostate Cancer. *EBioMedicine* 2016;10:150-63.
10. LENT SOMA scales for all anatomic sites. *Int J Radiat Oncol Biol Phys* 1995;31(5):1049-91.
11. Dearnaley DP, Hall E, Lawrence D, *et al.* Phase III pilot study of dose escalation using conformal radiotherapy in prostate cancer: PSA control and side effects. *Br J Cancer* 2005;92(3):488-98.
12. *RTOG/EORTC Late Radiation Morbidity Scoring Schema.*  
<https://www.rtog.org/ResearchAssociates/AdverseEventReporting/RTOGEORTCLateRadiationMorbidityScoringSchema.aspx>.
13. National Cancer Institute. Common Terminology Criteria for Adverse Events v4.0. In. *NIH publication # 09-7473*; NCI, NIH, DHHS. May 29, 2009.
14. Barry MJ, Fowler FJ, Jr., O'Leary MP, *et al.* The American Urological Association symptom index for benign prostatic hyperplasia. The Measurement Committee of the American Urological Association. *J Urol* 1992;148(5):1549-57; discussion 1564.
15. Marchini J, Howie B, Myers S, *et al.* A new multipoint method for genome-wide association studies by imputation of genotypes. *Nat Genet* 2007;39(7):906-13.

16. Genomes Project C, Auton A, Brooks LD, *et al.* A global reference for human genetic variation. *Nature* 2015;526(7571):68-74.
17. Amos CI, Dennis J, Wang Z, *et al.* The OncoArray Consortium: A Network for Understanding the Genetic Architecture of Common Cancers. *Cancer Epidemiol Biomarkers Prev* 2017;26(1):126-135.
18. Wakefield J. A Bayesian measure of the probability of false discovery in genetic epidemiology studies. *Am J Hum Genet* 2007;81(2):208-27.
19. McLaren W, Gil L, Hunt SE, *et al.* The Ensembl Variant Effect Predictor. *Genome Biol* 2016;17(1):122.
20. Consortium EP. An integrated encyclopedia of DNA elements in the human genome. *Nature* 2012;489(7414):57-74.
21. Sloan CA, Chan ET, Davidson JM, *et al.* ENCODE data at the ENCODE portal. *Nucleic Acids Res* 2016;44(D1):D726-32.
22. Pruim RJ, Welch RP, Sanna S, *et al.* LocusZoom: regional visualization of genome-wide association scan results. *Bioinformatics* 2010;26(18):2336-7.
23. Lamparter D, Marbach D, Rueedi R, *et al.* Fast and Rigorous Computation of Gene and Pathway Scores from SNP-Based Summary Statistics. *PLoS Comput Biol* 2016;12(1):e1004714.
24. Pandey G, Pandey OP, Rogers AJ, *et al.* A Nasal Brush-based Classifier of Asthma Identified by Machine Learning Analysis of Nasal RNA Sequence Data. *Sci Rep* 2018;8(1):8826.
25. Aulchenko YS, Struchalin MV, van Duijn CM. ProbABEL package for genome-wide association analysis of imputed data. *BMC Bioinformatics* 2010;11:134.
26. Barnett GC, West CM, Coles CE, *et al.* Standardized Total Average Toxicity score: a scale- and grade-independent measure of late radiotherapy toxicity to facilitate pooling of data from different studies. *Int J Radiat Oncol Biol Phys* 2012;82(3):1065-74.

## Supplementary Notes

### The PRACTICAL Consortium (<http://practical.icr.ac.uk/>):

Rosalind A. Eeles<sup>1,2</sup>, Brian E. Henderson<sup>3\*</sup>, Christopher A. Haiman<sup>3</sup>, ZSofia Kote-Jarai<sup>1</sup>, Fredrick R. Schumacher<sup>4,5</sup>, Ali Amin Al Olama<sup>6,7</sup>, Sara Benlloch<sup>6,1</sup>, Kenneth Muir<sup>8,9</sup>, Sonja I. Berndt<sup>10</sup>, David V. Conti<sup>3</sup>, Fredrik Wiklund<sup>11</sup>, Stephen Chanock<sup>10</sup>, Susan Gapstur<sup>12</sup>, Victoria L. Stevens<sup>12</sup>, Catherine M. Tangen<sup>13</sup>, Jyotsna Batra<sup>14,15</sup>, Judith Clements<sup>14,15</sup>, Australian Prostate Cancer BioResource (APCB)<sup>14</sup>, Henrik Gronberg<sup>11</sup>, Nora Pashayan<sup>16,17</sup>, Johanna Schleutker<sup>18,19</sup>, Demetrius Albanes<sup>10</sup>, Alicja Wolk<sup>20, 21</sup>, Catharine West<sup>22</sup>, Lorelei



Mucci<sup>23</sup>, Géraldine Cancel-Tassin<sup>24,25</sup>, Stella Koutros<sup>10</sup>, Karina Dalsgaard Sorensen<sup>26,27</sup>, Eli Marie Grindedal<sup>28</sup>, David E. Neal<sup>29,30,31</sup>, Freddie C. Hamdy<sup>31</sup>, Jenny L. Donovan<sup>32</sup>, Ruth C. Travis<sup>33</sup>, Robert J. Hamilton<sup>34</sup>, Sue Ann Ingles<sup>3</sup>, Barry S. Rosenstein<sup>35,36</sup>, Yong-Jie Lu<sup>37</sup>, Graham G. Giles<sup>38,39</sup>, Adam S. Kibel<sup>40</sup>, Ana Vega<sup>41</sup>, Manolis Kogevinas<sup>42,43,44,45</sup>, Kathryn L. Penney<sup>46</sup>, Jong Y. Park<sup>47</sup>, Janet L. Stanford<sup>48,49</sup>, Cezary Cybulski<sup>50</sup>, Børge G. Nordestgaard<sup>51,52</sup>, Hermann Brenner<sup>53,54,55</sup>, Christiane Maier<sup>56</sup>, Jeri Kim<sup>57</sup>, Esther M. John<sup>58,59</sup>, Manuel R. Teixeira<sup>60,61</sup>, Susan L. Neuhausen<sup>62</sup>, Kim De Ruyc<sup>63</sup>, Azad Razack<sup>64</sup>, Lisa F. Newcomb<sup>48,65</sup>, Davor Lesel<sup>66</sup>, Radka Kaneva<sup>67</sup>, Nawaid Usmani<sup>68,69</sup>, Frank Claessens<sup>70</sup>, Paul A. Townsend<sup>71</sup>, Manuela Gago-Dominguez<sup>72,73</sup>, Monique J. Roobol<sup>74</sup>, Florence Menegaux<sup>75</sup>, Kay-Tee Khaw<sup>76</sup>, Lisa Cannon-Albright<sup>77,78</sup>, Hardev Pandha<sup>79</sup>, Stephen N. Thibodeau<sup>80</sup>

\*In memorium

<sup>1</sup> The Institute of Cancer Research, London, UK.

<sup>2</sup> Royal Marsden NHS Foundation Trust, London, UK.

<sup>3</sup> Department of Preventive Medicine, Keck School of Medicine, University of Southern California/Norris Comprehensive Cancer Center, Los Angeles, CA, USA.

<sup>4</sup> Department of Epidemiology and Biostatistics, Case Western Reserve University, Cleveland, OH, USA.

<sup>5</sup> Seidman Cancer Center, University Hospitals, Cleveland, OH, USA.

<sup>6</sup> Centre for Cancer Genetic Epidemiology, Department of Public Health and Primary Care, University of Cambridge, Strangeways Research Laboratory, Cambridge, UK.

<sup>7</sup> University of Cambridge, Department of Clinical Neurosciences, Cambridge, UK.

<sup>8</sup> Division of Population Health, Health Services Research and Primary Care, University of Manchester, Manchester, UK.

<sup>9</sup> Warwick Medical School, University of Warwick, Coventry, UK.

<sup>10</sup> Division of Cancer Epidemiology and Genetics, National Cancer Institute, NIH, Bethesda, MD, USA.

<sup>11</sup> Department of Medical Epidemiology and Biostatistics, Karolinska Institute, Stockholm, Sweden.

<sup>12</sup> Epidemiology Research Program, American Cancer Society, 250 Williams Street, Atlanta, GA, USA.

<sup>13</sup> SWOG Statistical Center, Fred Hutchinson Cancer Research Center, Seattle, WA, USA.

<sup>14</sup> Australian Prostate Cancer Research Centre-Qld, Institute of Health and Biomedical Innovation and School of Biomedical Science, Queensland University of Technology, Brisbane, Queensland, Australia.

<sup>15</sup> Translational Research Institute, Brisbane, Queensland, Australia.

<sup>16</sup> University College London, Department of Applied Health Research, London, UK.

<sup>17</sup> Centre for Cancer Genetic Epidemiology, Department of Oncology, University of Cambridge, Strangeways Laboratory, Cambridge, UK.

<sup>18</sup> Department of Medical Biochemistry and Genetics, Institute of Biomedicine, University of Turku, Finland.

<sup>19</sup> Tyks Microbiology and Genetics, Department of Medical Genetics, Turku University Hospital, Finland.

<sup>20</sup> Division of Nutritional Epidemiology, Institute of Environmental Medicine, Karolinska Institutet, Sweden.

<sup>21</sup> Department of Surgical Sciences, Uppsala University, Uppsala, Sweden.

<sup>22</sup> Division of Cancer Sciences, University of Manchester, Manchester Academic Health Science Centre, Radiotherapy Related Research, Manchester NIHR Biomedical Research Centre, The Christie Hospital NHS Foundation Trust, Manchester, UK.

<sup>23</sup> Department of Epidemiology, Harvard T.H Chan School of Public Health, Boston, MA, USA.

<sup>24</sup> CeRePP, Tenon Hospital, Paris, France.

<sup>25</sup> UPMC Sorbonne Universites, GRC N°5 ONCOTYPE-URO, Tenon Hospital, Paris, France.

<sup>26</sup> Department of Molecular Medicine, Aarhus University Hospital, Denmark.

<sup>27</sup> Department of Clinical Medicine, Aarhus University, Denmark.

<sup>28</sup> Department of Medical Genetics, Oslo University Hospital, Norway.

<sup>29</sup> University of Cambridge, Department of Oncology, Addenbrooke's Hospital, Cambridge, UK.

<sup>30</sup> Cancer Research UK Cambridge Research Institute, Li Ka Shing Centre, Cambridge, UK.

<sup>31</sup> Nuffield Department of Surgical Sciences, University of Oxford, Oxford, UK, Faculty of Medical Science, University of Oxford, John Radcliffe Hospital, Oxford, UK.

<sup>32</sup> School of Social and Community Medicine, University of Bristol, Bristol, UK.

<sup>33</sup> Cancer Epidemiology Unit, Nuffield Department of Population Health University of Oxford, Oxford, UK.

<sup>34</sup> Dept. of Surgical Oncology, Princess Margaret Cancer Centre, Toronto, Canada.

<sup>35</sup> Department of Radiation Oncology, Icahn School of Medicine at Mount Sinai, New York, NY, USA.

- <sup>36</sup> Department of Genetics and Genomic Sciences, Icahn School of Medicine at Mount Sinai, New York, NY, USA.
- <sup>37</sup> Centre for Molecular Oncology, Barts Cancer Institute, Queen Mary University of London, John Vane Science Centre, London, UK.
- <sup>38</sup> Cancer Epidemiology & Intelligence Division, The Cancer Council Victoria, Melbourne, Victoria, Australia.
- <sup>39</sup> Centre for Epidemiology and Biostatistics, Melbourne School of Population and Global Health, The University of Melbourne, Melbourne, Australia.
- <sup>40</sup> Division of Urologic Surgery, Brigham and Womens Hospital, Boston, MA, USA.
- <sup>41</sup> Fundación Pública Galega de Medicina Xenómica-SERGAS, Grupo de Medicina Xenómica, CIBERER, IDIS, Santiago de Compostela, Spain.
- <sup>42</sup> Centre for Research in Environmental Epidemiology (CREAL), Barcelona Institute for Global Health (ISGlobal), Barcelona, Spain.
- <sup>43</sup> CIBER Epidemiología y Salud Pública (CIBERESP), Madrid, Spain.
- <sup>44</sup> IMIM (Hospital del Mar Research Institute), Barcelona, Spain.
- <sup>45</sup> Universitat Pompeu Fabra (UPF), Barcelona, Spain.
- <sup>46</sup> Channing Division of Network Medicine, Department of Medicine, Brigham and Women's Hospital/Harvard Medical School, Boston, MA, USA.
- <sup>47</sup> Department of Cancer Epidemiology, Moffitt Cancer Center, Tampa, USA.
- <sup>48</sup> Division of Public Health Sciences, Fred Hutchinson Cancer Research Center, Seattle, Washington, USA.
- <sup>49</sup> Department of Epidemiology, School of Public Health, University of Washington, Seattle, Washington, USA.
- <sup>50</sup> International Hereditary Cancer Center, Department of Genetics and Pathology, Pomeranian Medical University, Szczecin, Poland.
- <sup>51</sup> Faculty of Health and Medical Sciences, University of Copenhagen, Denmark.
- <sup>52</sup> Department of Clinical Biochemistry, Herlev and Gentofte Hospital, Copenhagen University Hospital, Herlev, Denmark.
- <sup>53</sup> Division of Clinical Epidemiology and Aging Research, German Cancer Research Center (DKFZ), Heidelberg, Germany.
- <sup>54</sup> German Cancer Consortium (DKTK), German Cancer Research Center (DKFZ), Heidelberg, Germany.
- <sup>55</sup> Division of Preventive Oncology, German Cancer Research Center (DKFZ) and National Center for Tumor Diseases (NCT), Heidelberg, Germany.
- <sup>56</sup> Institute for Human Genetics, University Hospital Ulm, Ulm, Germany.
- <sup>57</sup> The University of Texas MD Anderson Cancer Center, Department of Genitourinary Medical Oncology, Houston, TX, USA.
- <sup>58</sup> Cancer Prevention Institute of California, Fremont, CA, USA.
- <sup>59</sup> Department of Health Research & Policy (Epidemiology) and Stanford Cancer Institute, Stanford University School of Medicine, Stanford, CA, USA.
- <sup>60</sup> Department of Genetics, Portuguese Oncology Institute of Porto, Porto, Portugal.
- <sup>61</sup> Biomedical Sciences Institute (ICBAS), University of Porto, Porto, Portugal.
- <sup>62</sup> Department of Population Sciences, Beckman Research Institute of the City of Hope, Duarte, CA, USA.
- <sup>63</sup> Ghent University, Faculty of Medicine and Health Sciences, Basic Medical Sciences, Gent, Belgium.
- <sup>64</sup> Department of Surgery, Faculty of Medicine, University of Malaya, Kuala Lumpur, Malaysia.
- <sup>65</sup> Department of Urology, University of Washington, Seattle, WA, USA.
- <sup>66</sup> Institute of Human Genetics, University Medical Center Hamburg-Eppendorf, Hamburg, Germany.
- <sup>67</sup> Molecular Medicine Center, Department of Medical Chemistry and Biochemistry, Medical University, Sofia, Bulgaria.
- <sup>68</sup> Department of Oncology, Cross Cancer Institute, University of Alberta, Edmonton, Alberta, Canada.
- <sup>69</sup> Division of Radiation Oncology, Cross Cancer Institute, Edmonton, Alberta, Canada.
- <sup>70</sup> Molecular Endocrinology Laboratory, Department of Cellular and Molecular Medicine, KU Leuven, Leuven, Belgium.
- <sup>71</sup> Institute of Cancer Sciences, Manchester Cancer Research Centre, University of Manchester, Manchester Academic Health Science Centre, St Mary's Hospital, Manchester, UK.
- <sup>72</sup> Genomic Medicine Group, Galician Foundation of Genomic Medicine, Instituto de Investigación Sanitaria de Santiago de Compostela (IDIS), Complejo Hospitalario Universitario de Santiago, Servicio Galego de Saúde, SERGAS, Santiago De Compostela, Spain.
- <sup>73</sup> University of California San Diego, Moores Cancer Center, La Jolla, CA, USA.
- <sup>74</sup> Department of Urology, Erasmus University Medical Center, Rotterdam, the Netherlands.

<sup>75</sup> Cancer & Environment Group, Center for Research in Epidemiology and Population Health (CESP), INSERM, University Paris-Sud, University Paris-Saclay, Villejuif, France.

<sup>76</sup> Clinical Gerontology Unit, University of Cambridge, Cambridge, UK.

<sup>77</sup> Division of Genetic Epidemiology, Department of Medicine, University of Utah School of Medicine, Salt Lake City, Utah, USA.

<sup>78</sup> George E. Wahlen Department of Veterans Affairs Medical Center, Salt Lake City, UT, USA.

<sup>79</sup> The University of Surrey, Guildford, Surrey, UK.

<sup>80</sup> Department of Laboratory Medicine and Pathology, Mayo Clinic, Rochester, MN, USA.

## Supplementary Tables

**Supplementary Table 1.** Definitions of toxicity grades. Semicolons indicate “or”.

| Toxicity endpoint by Study and toxicity grading tool                                                                                                                                                                                                                                                                                                                 | Grade definitions                                                                                                                                                                                                                                                                                                                                                                                                                                                                                                                                                                                                                                                                                                                                                                                                                                                                                                                                                                                                                                                                                                                                                                                                                                                              |
|----------------------------------------------------------------------------------------------------------------------------------------------------------------------------------------------------------------------------------------------------------------------------------------------------------------------------------------------------------------------|--------------------------------------------------------------------------------------------------------------------------------------------------------------------------------------------------------------------------------------------------------------------------------------------------------------------------------------------------------------------------------------------------------------------------------------------------------------------------------------------------------------------------------------------------------------------------------------------------------------------------------------------------------------------------------------------------------------------------------------------------------------------------------------------------------------------------------------------------------------------------------------------------------------------------------------------------------------------------------------------------------------------------------------------------------------------------------------------------------------------------------------------------------------------------------------------------------------------------------------------------------------------------------|
| <p>Increased urinary frequency*</p> <p>RAPPER<br/>LENT-SOMA subjective [LS-s] and management [LS-m] scales; Royal Marsden Hospital [RMH] scale</p> <p>RADIOGEN<br/>CCI-EBRT<br/>UGhent<sup>†</sup><br/>PRRG<br/>CTCAEv3.0 - Urinary frequency/urgency<br/>Gene-PARE<br/>NTMC<br/>American Urological Association Symptom Score Q2<sup>‡</sup> and Q7<sup>§</sup></p> | <p>0 = daytime frequency &gt;4 hour intervals (LS-s) &amp; no treatment (LS-m) &amp; nocturia 0-1 times (RMH)<br/>1 = daytime frequency 3-4 hour intervals (LS-s) or 2-3 hour intervals (LS-s); alkalization (LS-m); nocturia 2-3 times (RMH)<br/>2 = daytime frequency 1-2 hour intervals (LS-s); anti-spasmodic (LS-m) OR regular narcotic (LS-m); nocturia 4-5 times (RMH)<br/>3 = daytime frequency hourly (LS-s); nocturia 6-8 times (RMH) or &gt;8 times (RMH)<br/>4 = cystectomy (LS-m)</p> <p>0 = No toxicity<br/>1 = Increase in frequency or nocturia up to 2 x normal; enuresis<br/>2 = Frequency or nocturia &gt;2 x normal but &lt;hourly<br/>3 = Frequency or nocturia ≥1 x/hr; urgency; catheter indicated</p> <p>0 = Had to urinate again less than 2 hours after you have urinated ‘not at all’ or ‘less than 1 time in 5’ &amp; no nocturia or nocturia 1 time<br/>1 = Had to urinate again less than 2 hours after you have urinated ‘less than ½ the time’ or ‘about ½ the time’; nocturia 2 times or 3 times<br/>2 = Had to urinate again less than 2 hours after you have urinated ‘more than ½ the time’; nocturia 4 times or 5 times<br/>3 = Had to urinate again less than 2 hours after you have urinated ‘more than ½ the time’ ‘almost always’</p> |
| <p>Decreased urinary stream<sup>  </sup></p> <p>RAPPER<br/>LENT-SOMA subjective [LS-s] and management [LS-m] scales</p> <p>RADIOGEN<br/>CCI-EBRT<br/>PRRG<br/>UGhent<br/>CTCAEv3.0 - Urinary retention</p>                                                                                                                                                           | <p>0 = No toxicity (LS-s) &amp; no treatment for decreased stream (LS-m)<br/>1 = Occasionally weak (LS-s)<br/>2 = Intermittent (LS-s); &lt; 1/day self-catheterization (LS-m)<br/>3 = Persistent but incomplete obstruction (LS-s); dilation or &gt; 1/day self-catheterization (LS-m)<br/>4 = complete obstruction (LS-s); permanent catheter or surgical intervention (LS-m)</p> <p>0 = No toxicity<br/>1 = Hesitancy or dribbling, no significant residual urine; retention occurring during the immediate postoperative period<br/>2 = Hesitancy requiring medication; or operative bladder atony requiring indwelling catheter beyond immediate postoperative period but for &lt;6 weeks<br/>3 = More than daily catheterization indicated; urological intervention indicated (e.g., TURP, suprapubic tube, urethrotomy)</p>                                                                                                                                                                                                                                                                                                                                                                                                                                              |

|                                                                                                                                       |                                                                                                                                                                                                                                                                                                                                                                                                                                                                                                                                                                                                    |
|---------------------------------------------------------------------------------------------------------------------------------------|----------------------------------------------------------------------------------------------------------------------------------------------------------------------------------------------------------------------------------------------------------------------------------------------------------------------------------------------------------------------------------------------------------------------------------------------------------------------------------------------------------------------------------------------------------------------------------------------------|
| <p>Gene-PARE<br/>NTMC<br/>American Urological Association Symptom Score<br/>Q5<sup>†</sup><br/>Hematuria<sup>#</sup></p>              | <p>4 = Life-threatening consequences; organ failure (e.g., bladder rupture); operative intervention requiring organ resection indicated<br/>0 = Had a weak urinary stream 'not at all' or 'less than 1 time in 5'<br/>1 = Had a weak urinary stream 'less than ½ the time'<br/>2 = Had a weak urinary stream 'about ½ the time' or 'more than ½ the time'<br/>3 = Had a weak urinary stream 'almost always'</p>                                                                                                                                                                                    |
| <p>RAPPER<br/>LENT-SOMA subjective [LS-s], objective [LS-o],<br/>and management [LS-m] scales; RTOG late<br/>effects [RTOG] scale</p> | <p>0 = No toxicity (LS-s) &amp; no treatment for hematuria (LS-m) &amp; no toxicity (RTOG)<br/>1 = Microscopic, normal hemoglobin (LS-o)<br/>2 = Occasional or Intermittent (LS-s); Iron therapy or Occasional transfusion/single cauterization (LS-m); Intermittent macroscopic, &lt; 10% decrease in hemoglobin (LS-o); (RTOG)<br/>3 = Persistent with clot (LS-s); Persistent macroscopic, 10-20% decrease in hemoglobin (LS-o); Frequent transfusion or coagulation (LS-m); (RTOG)<br/>4 = Refractory (LS-s); Surgical intervention (LS-m); &gt; 20% decrease in hemoglobin (LS-o); (RTOG)</p> |
| <p>RADIOGEN<br/>CCI-EBRT<br/>PRRG<br/>CTCAEv3.0 - Cystitis</p>                                                                        | <p>0 = None<br/>1 = Asymptomatic<br/>2 = Frequency with dysuria; macroscopic hematuria<br/>3 = Transfusion; IV pain medications; bladder irrigation indicated<br/>4 = Catastrophic bleeding; major non-elective intervention indicated</p>                                                                                                                                                                                                                                                                                                                                                         |
| <p>Gene-PARE<br/>Institutional scale<br/>Rectal bleeding<sup>**</sup></p>                                                             | <p>0 = None or microscopic hematuria<br/>2 = Macroscopic hematuria</p>                                                                                                                                                                                                                                                                                                                                                                                                                                                                                                                             |
| <p>RAPPER<br/>LENT-SOMA objective (LS-o) and management<br/>(LS-m) scales; Royal Marsden Hospital (RMH)<br/>scale</p>                 | <p>0 = None or Occult (LS-o) &amp; None (LS-m) &amp; None (RMH)<br/>1 = Stool softener, iron therapy (LS-m); Occasional-no treatment (RMH)<br/>2 = Occasionally, &gt;2x/week (LS-o); Occasional transfusion (LS-m); Moderate-simple OPD treatment (RMH)<br/>3 = Severe (blood transfusion, surgery)<br/>4 = Life-threatening consequences; major urgent intervention indicated</p>                                                                                                                                                                                                                 |
| <p>RADIOGEN<br/>CCI-EBRT<br/>CTCAEv3.0 - GI hemorrhage</p>                                                                            | <p>0 = None<br/>1 = Mild, intervention (other than iron supplements) not indicated<br/>2 = Symptomatic and medical intervention or minor cauterization indicated<br/>3 = Transfusion, interventional radiology, endoscopic, or operative intervention indicated; radiation therapy (i.e., haemostasis of bleeding site)<br/>4 = Life-threatening consequences; major urgent intervention indicated</p>                                                                                                                                                                                             |
| <p>UGhent<br/>CCI-BT<br/>Institutional scale</p>                                                                                      | <p>0 = None<br/>2 = Bleeding present</p>                                                                                                                                                                                                                                                                                                                                                                                                                                                                                                                                                           |

\* Increased urinary frequency was not analyzed in CCI-BT because pre-radiotherapy assessments were more than one year prior to starting radiotherapy for the majority of participants. Abbreviations: OPD, outpatient department; NA, grade not applicable

<sup>†</sup> UGhent used an institutional-specific scaled based on CTCAEv3.0

<sup>‡</sup> During the past month or so, how often have you had to urinate again less than two hours after you finished urinating?

<sup>§</sup> Over the past month, how many times per night did you most typically get up to urinate from the time you went to bed at night until the time you got up in the morning?

<sup>||</sup> Decreased urinary stream was not analyzed in CCI-BT because pre-radiotherapy assessments were more than one year prior to starting radiotherapy for the majority of participants.

<sup>¶</sup> During the past month, how often have you had a weak urinary stream?

<sup>#</sup> Endpoint not available in CCI-BT, UGhent or NTMC

<sup>\*\*</sup> Rectal bleeding was not assessed in NTMC or PRRG. Rectal bleeding was assigned a single grade in GenePARE using information across all follow up assessments, and so this endpoint was not available for analysis using Cox proportional hazards modeling.

**Supplementary Table 2.** Power\* to detect statistically significant associations among 3,871 radiotherapy patients

| Per-allele Odds Ratio | Minor allele frequency, % |      |      |      |      |      |
|-----------------------|---------------------------|------|------|------|------|------|
|                       | 0.05                      | 0.10 | 0.15 | 0.25 | 0.35 | 0.50 |
| 1.15                  | 0                         | 0    | 0    | 0    | 0    | 0    |
| 1.25                  | 0                         | 0    | 0    | 0    | 1    | 1    |
| 1.50                  | 0                         | 2    | 7    | 26   | 43   | 52   |
| 1.75                  | 3                         | 22   | 54   | 89   | 97   | 99   |
| 2.00                  | 12                        | 65   | 93   | 100  | 100  | 100  |
| 2.25                  | 34                        | 93   | 100  | 100  | 100  | 100  |

\* Assuming a type I error rate of  $5 \times 10^{-8}$  and number of toxicity cases and non-toxicity controls for the most rare toxicity, hematuria, included in the study. Power for more prevalent toxicities is greater than that presented in the table.

**Supplementary Table 3.** Top SNPs that did not reach genome-wide significance and rare variants

| rsID                                                                     | location<br>(chr_position_a1_a2) | Toxicity Outcome            | MAF* | Info† | HR‡ (95% CI)                   | P <sub>meta</sub> §   | BFDPII |
|--------------------------------------------------------------------------|----------------------------------|-----------------------------|------|-------|--------------------------------|-----------------------|--------|
| Common SNPs with $5 \times 10^{-8} < P_{\text{meta}} < 5 \times 10^{-7}$ |                                  |                             |      |       |                                |                       |        |
| rs9644474                                                                | 8_137163144_C_T                  | Rectal bleeding             | 0.05 | 0.78  | 2.15 (1.64, 2.81) <sup>†</sup> | $7.9 \times 10^{-08}$ | 9.1    |
| rs75759941                                                               | 23_38151042_T_C                  | STAT score                  | 0.05 | 0.99  | 0.25 (0.16, 0.34) <sup>#</sup> | $9.3 \times 10^{-08}$ | 5.8    |
| rs11122572                                                               | 1_230825427_T_G                  | Hematuria                   | 0.09 | 0.99  | 1.86 (1.48, 2.34)              | $9.8 \times 10^{-08}$ | 8.2    |
| rs368141164                                                              | 11_116445686_A_T                 | Increased urinary frequency | 0.06 | 0.95  | 1.87 (1.48, 2.36)              | $1.8 \times 10^{-07}$ | 13.8   |
| NA                                                                       | 18_57916552_A_C                  | STAT score                  | 0.26 | 1.00  | 0.07 (0.04, 0.10) <sup>#</sup> | $1.6 \times 10^{-7}$  | 23.5   |
| rs2031925                                                                | 10_30680024_T_C                  | Rectal bleeding             | 0.05 | 0.59  | 2.43 (1.73, 3.40)              | $2.4 \times 10^{-07}$ | 33.1   |
| rs17190422                                                               | 2_56856260_A_G                   | Hematuria                   | 0.06 | 0.90  | 2.57 (1.79, 3.68)              | $3.1 \times 10^{-07}$ | 43.0   |
| rs74346764                                                               | 3_145230069_G_A                  | Rectal bleeding             | 0.05 | 0.89  | 2.52 (1.77, 3.58)              | $3.1 \times 10^{-07}$ | 41.2   |
| rs72993079                                                               | 19_6573511_C_T                   | Hematuria                   | 0.05 | 0.75  | 2.14 (1.60, 2.87)              | $3.5 \times 10^{-07}$ | 30.3   |
| rs9832989                                                                | 3_133701823_A_G                  | Hematuria                   | 0.06 | 0.83  | 4.45 (2.50, 7.92)              | $3.8 \times 10^{-07}$ | 88.9   |
| rs60424486                                                               | 7_15410311_G_INS                 | Decreased urinary stream    | 0.08 | 0.93  | 1.84 (1.45, 2.33)              | $4.0 \times 10^{-07}$ | 24.1   |
| rs11624322                                                               | 14_37058609_C_T                  | Decreased urinary stream    | 0.37 | 0.99  | 1.51 (1.29, 1.77)              | $4.2 \times 10^{-07}$ | 19.0   |
| rs61871726                                                               | 10_122293568_T_C                 | Rectal bleeding             | 0.07 | 0.92  | 1.98 (1.52, 2.59)              | $4.8 \times 10^{-07}$ | 31.2   |
| rs2237706                                                                | 7_107633171_C_T                  | Rectal bleeding             | 0.09 | 0.68  | 1.94 (1.50, 2.52)              | $4.8 \times 10^{-07}$ | 30.0   |
| rs6791846                                                                | 3_177119317_G_A                  | Increased urinary frequency | 0.45 | 0.90  | 1.47 (1.26, 1.71)              | $5.0 \times 10^{-07}$ | 21.3   |
| Rare variants with $P_{\text{meta}} < 5 \times 10^{-7}$                  |                                  |                             |      |       |                                |                       |        |
| NA                                                                       | 12_102080173_A_G                 | RecBld                      | 0.03 | 0.82  | 3.57 (2.37, 5.39)              | $1.4 \times 10^{-09}$ | 2.6    |
| rs180958289                                                              | 19_1543771_G_A                   | DecStrm                     | 0.02 | 0.65  | 7.78 (3.92, 15.5)              | $4.6 \times 10^{-09}$ | 72.4   |
| rs13403657                                                               | 2_241943450_A_G                  | Hematuria                   | 0.03 | 0.82  | 3.26 (2.17, 4.90)              | $1.4 \times 10^{-08}$ | 11.8   |
| rs139239158                                                              | 3_59904329_C_G                   | DecStrm                     | 0.02 | 0.80  | 3.69 (2.32, 5.87)              | $3.4 \times 10^{-08}$ | 34.0   |
| rs191705561                                                              | 4_184691564_G_T                  | UrineFreq                   | 0.01 | 0.54  | 3.05 (2.05, 4.53)              | $3.7 \times 10^{-08}$ | 18.9   |
| rs148048756                                                              | 8_562963_A_G                     | RecBld                      | 0.03 | 0.78  | 4.83 (2.75, 8.47)              | $4.0 \times 10^{-08}$ | 65.7   |
| rs75988504                                                               | 2_141730052_G_A                  | DecStrm                     | 0.04 | 0.99  | 2.01 (1.56, 2.58)              | $4.9 \times 10^{-08}$ | 5.5    |
| rs139288166                                                              | 8_705922_A_C                     | RecBld                      | 0.03 | 0.85  | 4.30 (2.53, 7.31)              | $6.9 \times 10^{-08}$ | 64.4   |
| rs139882217                                                              | 3_54729912_C_T                   | Hematuria                   | 0.04 | 0.74  | 4.78 (2.71, 8.44)              | $6.9 \times 10^{-08}$ | 73.8   |
| NA                                                                       | 12_31100664_C_G                  | Hematuria                   | 0.02 | 0.99  | 9.22 (4.06, 20.9)              | $1.1 \times 10^{-07}$ | 97.5   |
| NA                                                                       | 12_33380941_C_T                  | STAT score                  | 0.04 | 0.99  | 0.17 (0.11, 0.23) <sup>#</sup> | $1.1 \times 10^{-07}$ | 8.0    |
| rs112193369                                                              | 1_7558251_A_INS                  | DecStrm                     | 0.02 | 0.91  | 4.09 (2.43, 6.90)              | $1.2 \times 10^{-07}$ | 70.3   |
| rs4688181                                                                | 3_63989456_A_G                   | Hematuria                   | 0.04 | 0.92  | 3.22 (2.09, 4.98)              | $1.3 \times 10^{-07}$ | 47.3   |
| rs149176864                                                              | 8_30559235_G_A                   | Rectal bleeding             | 0.02 | 0.73  | 2.99 (1.99, 4.49)              | $1.4 \times 10^{-07}$ | 41.4   |
| rs3739643                                                                | 9_4600633_C_T                    | Hematuria                   | 0.04 | 0.89  | 3.44 (2.17, 5.47)              | $1.7 \times 10^{-07}$ | 60.3   |
| rs73539559                                                               | 6_112344737_C_T                  | Hematuria                   | 0.02 | 0.85  | 2.86 (1.93, 4.26)              | $2.0 \times 10^{-07}$ | 44.4   |
| rs190601686                                                              | 9_86200809_C_T                   | Hematuria                   | 0.01 | 0.79  | 9.13 (3.95, 21.1)              | $2.3 \times 10^{-07}$ | 98.3   |
| rs149927798                                                              | 3_26548947_C_T                   | RecBld                      | 0.02 | 0.55  | 3.98 (2.36, 6.71)              | $2.3 \times 10^{-07}$ | 77.8   |
| rs490393                                                                 | 6_114228700_C_A                  | Hematuria                   | 0.03 | 0.82  | 2.96 (1.96, 4.47)              | $2.4 \times 10^{-07}$ | 51.6   |
| rs73712257                                                               | 8_138319386_A_T                  | RecBld                      | 0.03 | 0.49  | 4.72 (2.62, 8.50)              | $2.4 \times 10^{-07}$ | 87.6   |
| rs144214859                                                              | 2_68624610_G_A                   | Hematuria                   | 0.02 | 0.99  | 2.58 (1.80, 3.70)              | $2.5 \times 10^{-07}$ | 39.3   |
| rs61415111                                                               | 11_17420841_A_C                  | UrineFreq                   | 0.02 | 0.61  | 4.60 (2.57, 8.24)              | $3.0 \times 10^{-07}$ | 88.3   |
| rs77581414                                                               | 19_10934094_T_A                  | DecStrm                     | 0.04 | 0.93  | 6.07 (3.04, 12.1)              | $3.1 \times 10^{-07}$ | 95.5   |
| rs76661052                                                               | 5_144759200_C_T                  | Hematuria                   | 0.03 | 0.86  | 2.33 (1.68, 3.22)              | $3.3 \times 10^{-07}$ | 35.5   |
| rs78166464                                                               | 19_5200653_C_T                   | DecStrm                     | 0.01 | 0.95  | 2.83 (1.90, 4.21)              | $3.4 \times 10^{-07}$ | 54.5   |
| rs186353960                                                              | 4_123920497_G_A                  | UrineFreq                   | 0.04 | 0.66  | 2.44 (1.73, 3.44)              | $3.4 \times 10^{-07}$ | 40.5   |



|             |                 |           |      |      |                   |                       |      |
|-------------|-----------------|-----------|------|------|-------------------|-----------------------|------|
| rs11687040  | 2_238080051_G_A | DecStrm   | 0.01 | 0.99 | 3.37 (2.11, 5.40) | $4.2 \times 10^{-07}$ | 74.5 |
| rs73046248  | 3_21759604_T_C  | DecStrm   | 0.04 | 0.85 | 2.40 (1.71, 3.36) | $4.2 \times 10^{-07}$ | 43.3 |
| rs192744896 | 15_27746339_T_C | RecBld    | 0.03 | 0.57 | 3.72 (2.23, 6.18) | $4.3 \times 10^{-07}$ | 81.5 |
| rs141203061 | 3_36244696_A_T  | UrineFreq | 0.03 | 0.86 | 2.71 (1.84, 4.00) | $4.3 \times 10^{-07}$ | 55.7 |
| rs113370662 | 4_3537697_C_T   | DecStrm   | 0.04 | 0.81 | 2.78 (1.87, 4.15) | $4.5 \times 10^{-07}$ | 59.3 |
| rs138731641 | 9_83229027_GA_G | Hematuria | 0.04 | 0.92 | 5.46 (2.82, 10.6) | $4.8 \times 10^{-07}$ | 95.3 |
| rs72915971  | 11_56925541_C_G | RecBld    | 0.02 | 0.95 | 2.16 (1.60, 2.91) | $5.0 \times 10^{-07}$ | 38.1 |

\* Minor allele frequency is from PRACTICAL oncoarray samples of European ancestry. Abbreviations: SNP, single nucleotide polymorphism; MAF, minor allele frequency; HR, hazard ratio; CI, confidence interval; BFDP, Bayesian false discovery probability; NA, not available; INS, insertion.

† Imputation info score values are from the oncoarray.

‡ Hazard ratio corresponds to the minor allele with the major allele treated as the reference group.

§ Two-sided  $P_{\text{meta}}$  was calculated using a Wald test.

|| BFDP estimated assuming a prior variance,  $W = 0.32^2$ , and prior probability of a non-null association 0.0001

¶ Hazard ratio is for the major allele with the minor allele treated as the reference group

# Beta coefficient from linear regression of STAT score at 2 years after radiotherapy

**Supplementary Table 4.** Credible causal variants identified by fine-scale mapping.

| rsid                                                | Position <sup>*</sup> | Ref    | Effect | Info <sup>†</sup> | Info <sup>‡</sup> | Info <sup>§</sup> | Info <sup>  </sup> | CCI-BT | Gene | RADIO- | RAPPER-II | UGhent | CCI-    | Gene | RAPPER-I |        |
|-----------------------------------------------------|-----------------------|--------|--------|-------------------|-------------------|-------------------|--------------------|--------|------|--------|-----------|--------|---------|------|----------|--------|
|                                                     |                       | Allele | Allele |                   |                   |                   |                    |        | EAF  |        |           |        | PARE-II | ERBT |          | PARE-I |
| chr1:230337180-231337180, associated with hematuria |                       |        |        |                   |                   |                   |                    |        |      |        |           |        |         |      |          |        |
| Signal 1                                            |                       |        |        |                   |                   |                   |                    |        |      |        |           |        |         |      |          |        |
| rs11122572                                          | 230825427             | T      | G      | 0.96              | 0.96              | 0.95              | 0.93               | --     | 0.09 | 0.10   | 0.08      | 0.09   | 0.09    | 0.07 | 0.09     |        |
| rs4846866                                           | 230836065             | T      | C      | 1.00              | 0.99              | 0.97              | 0.92               | --     | 0.06 | 0.09   | 0.07      | 0.07   | 0.08    | 0.06 | 0.08     |        |
| rs61762468                                          | 230836281             | G      | C      | 0.98              | 0.96              | 0.98              | 0.90               | --     | 0.06 | 0.09   | 0.07      | 0.08   | 0.08    | 0.06 | 0.08     |        |
| rs56117713                                          | 230836568             | T      | C      | 0.99              | 1.00              | 0.99              | 0.92               | --     | 0.06 | 0.08   | 0.07      | 0.07   | 0.08    | 0.06 | 0.08     |        |
| rs16852352                                          | 230836786             | T      | G      | 0.99              | 1.00              | 1.00              | 0.92               | --     | 0.06 | 0.08   | 0.07      | 0.07   | 0.08    | 0.06 | 0.08     |        |
| rs11122573                                          | 230837180             | C      | T      | 0.99              | 1.00              | 1.00              | 0.92               | --     | 0.06 | 0.08   | 0.07      | 0.07   | 0.08    | 0.06 | 0.08     |        |
| rs10864770                                          | 230837437             | G      | A      | 0.99              | 0.97              | 1.00              | 0.92               | --     | 0.06 | 0.08   | 0.07      | 0.07   | 0.08    | 0.06 | 0.08     |        |
| rs10864771                                          | 230837672             | T      | G      | 0.99              | 1.00              | 0.99              | 0.92               | --     | 0.06 | 0.08   | 0.07      | 0.07   | 0.08    | 0.06 | 0.08     |        |
| rs11122574                                          | 230837808             | C      | T      | 0.97              | 0.96              | 0.96              | 0.86               | --     | 0.04 | 0.06   | 0.05      | 0.05   | 0.07    | 0.04 | 0.05     |        |
| rs1926723                                           | 230840096             | T      | C      | 0.98              | 0.97              | 1.00              | 0.92               | --     | 0.06 | 0.08   | 0.07      | 0.07   | 0.08    | 0.06 | 0.08     |        |
| rs1926722                                           | 230840197             | C      | A      | 0.98              | 1.00              | 1.00              | 0.92               | --     | 0.06 | 0.08   | 0.07      | 0.07   | 0.08    | 0.06 | 0.08     |        |
| rs11122575                                          | 230840269             | A      | G      | 0.98              | 1.00              | 1.00              | 0.92               | --     | 0.06 | 0.08   | 0.07      | 0.07   | 0.08    | 0.06 | 0.08     |        |
| rs11568056                                          | 230842497             | C      | T      | 0.97              | 0.98              | 0.96              | 0.91               | --     | 0.06 | 0.09   | 0.07      | 0.08   | 0.08    | 0.06 | 0.08     |        |
| rs11122576                                          | 230846679             | T      | C      | 1.00              | 1.00              | 0.98              | 0.95               | --     | 0.06 | 0.09   | 0.07      | 0.08   | 0.08    | 0.06 | 0.08     |        |
| rs11568028                                          | 230847244             | C      | T      | 1.00              | 1.00              | 1.00              | 0.95               | --     | 0.06 | 0.09   | 0.07      | 0.08   | 0.08    | 0.06 | 0.08     |        |
| rs11122578                                          | 230847789             | G      | A      | 1.00              | 1.00              | 1.00              | 0.95               | --     | 0.06 | 0.09   | 0.07      | 0.08   | 0.08    | 0.06 | 0.08     |        |
| rs3789679                                           | 230849694             | G      | A      | 0.98              | 0.99              | 0.97              | 0.94               | --     | 0.06 | 0.09   | 0.07      | 0.08   | 0.08    | 0.06 | 0.08     |        |
| rs9804147                                           | 230853359             | G      | A      | 0.99              | 0.99              | 0.99              | 0.98               | --     | 0.10 | 0.11   | 0.10      | 0.10   | 0.09    | 0.09 | 0.10     |        |
| rs9804153                                           | 230853905             | G      | T      | 0.99              | 1.00              | 0.99              | 0.98               | --     | 0.10 | 0.11   | 0.10      | 0.10   | 0.09    | 0.09 | 0.10     |        |
| rs4028824                                           | 230854141             | G      | A      | 0.99              | 1.00              | 1.00              | 0.98               | --     | 0.10 | 0.11   | 0.10      | 0.10   | 0.09    | 0.09 | 0.10     |        |
| rs10864773                                          | 230856996             | C      | T      | 0.99              | 1.00              | 0.97              | 0.97               | --     | 0.06 | 0.09   | 0.09      | 0.09   | 0.09    | 0.07 | 0.09     |        |
| rs61762467                                          | 230836254-5           | -      | T      | 0.99              | 1.00              | 0.99              | 0.92               | --     | 0.06 | 0.08   | 0.07      | 0.07   | 0.08    | 0.06 | 0.08     |        |
| Signal 2                                            |                       |        |        |                   |                   |                   |                    |        |      |        |           |        |         |      |          |        |
| rs4846857                                           | 230436175             | A      | G      | 1.00              | 0.64              | 0.61              | 0.48               | --     | 0.86 | 0.87   | 0.85      | 0.85   | 0.86    | 0.84 | 0.85     |        |
| rs79434380                                          | 230451274             | C      | T      | 0.68              | 0.52              | 0.57              | 0.45               | --     | 0.03 | 0.02   | 0.01      | 0.01   | 0.02    | 0.03 | 0.02     |        |
| rs564325629                                         | 230451573             | G      | -      | 0.71              | 0.52              | 0.53              | 0.45               | --     | 0.03 | 0.01   | 0.01      | 0.01   | 0.01    | 0.03 | 0.01     |        |
| rs147121532                                         | 230451849             | T      | C      | 0.72              | 0.52              | 0.53              | 0.45               | --     | 0.03 | 0.01   | 0.01      | 0.01   | 0.01    | 0.02 | 0.01     |        |
| rs28605378                                          | 230882070             | G      | A      | 0.96              | 0.95              | 0.78              | 0.89               | --     | 0.08 | 0.07   | 0.06      | 0.08   | 0.06    | 0.09 | 0.06     |        |
| rs12095859                                          | 230882213             | T      | C      | 0.95              | 0.95              | 0.78              | 0.90               | --     | 0.08 | 0.07   | 0.06      | 0.07   | 0.06    | 0.09 | 0.06     |        |
| rs12091328                                          | 230884209             | G      | C      | 0.99              | 0.96              | 0.80              | 0.90               | --     | 0.08 | 0.07   | 0.06      | 0.08   | 0.06    | 0.09 | 0.06     |        |
| rs12059171                                          | 230885399             | T      | G      | 0.99              | 0.96              | 0.81              | 0.91               | --     | 0.08 | 0.07   | 0.06      | 0.07   | 0.06    | 0.09 | 0.06     |        |
| rs12060898                                          | 230887539             | A      | G      | 0.98              | 0.96              | 0.82              | 0.90               | --     | 0.08 | 0.07   | 0.06      | 0.07   | 0.06    | 0.09 | 0.06     |        |
| rs75991123                                          | 230892946             | C      | A      | 0.96              | 0.97              | 0.89              | 0.94               | --     | 0.06 | 0.06   | 0.05      | 0.06   | 0.05    | 0.08 | 0.06     |        |

chr5:156903410-157903410, associated with rectal bleeding

|            |           |   |   |      |      |    |      |      |    |      |      |      |      |    |      |
|------------|-----------|---|---|------|------|----|------|------|----|------|------|------|------|----|------|
| rs17055178 | 157403410 | A | G | 0.96 | 0.94 | -- | 0.96 | 0.08 | -- | 0.08 | 0.08 | 0.07 | 0.07 | -- | 0.06 |
| rs13180537 | 157419681 | C | T | 0.90 | 0.81 | -- | 0.88 | 0.07 | -- | 0.07 | 0.07 | 0.06 | 0.05 | -- | 0.05 |
| rs78394554 | 157438561 | A | C | 0.93 | 0.91 | -- | 0.94 | 0.08 | -- | 0.08 | 0.08 | 0.07 | 0.06 | -- | 0.06 |
| rs34395161 | 157440433 | C | A | 0.90 | 0.80 | -- | 0.89 | 0.07 | -- | 0.07 | 0.07 | 0.06 | 0.05 | -- | 0.05 |
| rs35327501 | 157452625 | G | A | 0.94 | 0.91 | -- | 0.94 | 0.08 | -- | 0.08 | 0.08 | 0.07 | 0.06 | -- | 0.06 |
| rs4704767  | 157470956 | C | T | 1.00 | 1.00 | -- | 0.98 | 0.08 | -- | 0.11 | 0.10 | 0.09 | 0.08 | -- | 0.08 |
| rs35929592 | 157471129 | C | T | 1.00 | 1.00 | -- | 0.98 | 0.08 | -- | 0.11 | 0.10 | 0.09 | 0.08 | -- | 0.08 |
| rs35766682 | 157472745 | C | T | 0.99 | 1.00 | -- | 0.98 | 0.08 | -- | 0.11 | 0.10 | 0.09 | 0.09 | -- | 0.08 |
| rs10515757 | 157473330 | A | T | 1.00 | 1.00 | -- | 0.98 | 0.08 | -- | 0.11 | 0.10 | 0.09 | 0.08 | -- | 0.08 |
| rs35153425 | 157478391 | A | G | 1.00 | 1.00 | -- | 0.98 | 0.08 | -- | 0.11 | 0.10 | 0.09 | 0.08 | -- | 0.08 |
| rs17055241 | 157480829 | G | A | 1.00 | 1.00 | -- | 0.98 | 0.08 | -- | 0.11 | 0.10 | 0.09 | 0.08 | -- | 0.08 |
| rs1040926  | 157483536 | A | G | 1.00 | 1.00 | -- | 0.98 | 0.09 | -- | 0.11 | 0.10 | 0.09 | 0.08 | -- | 0.08 |
| rs13179825 | 157485371 | C | T | 1.00 | 1.00 | -- | 0.98 | 0.08 | -- | 0.11 | 0.10 | 0.08 | 0.08 | -- | 0.08 |
| rs13184115 | 157485718 | C | A | 1.00 | 1.00 | -- | 0.97 | 0.09 | -- | 0.11 | 0.10 | 0.08 | 0.09 | -- | 0.08 |
| rs17229231 | 157486935 | C | T | 0.99 | 1.00 | -- | 0.98 | 0.08 | -- | 0.11 | 0.10 | 0.09 | 0.08 | -- | 0.08 |

chr9:30366808-31366808, associated with decreased urinary stream

|             |            |     |    |      |      |      |      |    |      |      |      |    |      |      |      |
|-------------|------------|-----|----|------|------|------|------|----|------|------|------|----|------|------|------|
| rs10969913  | 30866808   | A   | G  | 0.95 | 0.83 | 0.98 | 0.70 | -- | 0.03 | 0.01 | 0.01 | -- | 0.02 | 0.04 | 0.01 |
| rs7868409   | 30868163   | T   | C  | 0.95 | 1.00 | 0.96 | 0.72 | -- | 0.03 | 0.01 | 0.01 | -- | 0.02 | 0.04 | 0.01 |
| rs10969915  | 30868871   | A   | C  | 0.95 | 0.88 | 0.98 | 0.72 | -- | 0.03 | 0.01 | 0.01 | -- | 0.01 | 0.04 | 0.01 |
| rs10969916  | 30869372   | C   | G  | 0.95 | 0.86 | 0.98 | 0.72 | -- | 0.03 | 0.01 | 0.01 | -- | 0.01 | 0.04 | 0.01 |
| rs1412406   | 30869687   | C   | T  | 0.95 | 0.88 | 0.98 | 0.71 | -- | 0.03 | 0.01 | 0.01 | -- | 0.01 | 0.04 | 0.01 |
| rs539024322 | 30873589   | A   | AT | 0.94 | 0.87 | 0.97 | 0.69 | -- | 0.03 | 0.01 | 0.01 | -- | 0.02 | 0.04 | 0.02 |
| rs10969918  | 30875780   | T   | C  | 0.97 | 1.00 | 0.95 | 0.71 | -- | 0.03 | 0.01 | 0.01 | -- | 0.02 | 0.04 | 0.01 |
| rs112134389 | 30876262   | T   | C  | 0.97 | 0.92 | 0.99 | 0.71 | -- | 0.03 | 0.01 | 0.01 | -- | 0.02 | 0.04 | 0.01 |
| rs111692482 | 30876567   | C   | T  | 0.97 | 0.93 | 0.99 | 0.71 | -- | 0.03 | 0.01 | 0.01 | -- | 0.02 | 0.04 | 0.01 |
| rs10969920  | 30876943   | A   | C  | 0.97 | 1.00 | 1.00 | 0.71 | -- | 0.03 | 0.01 | 0.01 | -- | 0.02 | 0.04 | 0.01 |
| rs10969923  | 30877317   | T   | C  | 0.96 | 0.88 | 0.97 | 0.68 | -- | 0.03 | 0.01 | 0.01 | -- | 0.02 | 0.04 | 0.02 |
| rs73644367  | 30877456   | A   | C  | 0.98 | 0.92 | 0.98 | 0.71 | -- | 0.03 | 0.01 | 0.01 | -- | 0.02 | 0.04 | 0.01 |
| rs73644368  | 30877580   | A   | G  | 0.97 | 0.91 | 0.97 | 0.71 | -- | 0.03 | 0.01 | 0.01 | -- | 0.02 | 0.04 | 0.01 |
| rs10969926  | 30878999   | T   | A  | 0.98 | 1.00 | 1.00 | 0.71 | -- | 0.03 | 0.01 | 0.01 | -- | 0.02 | 0.04 | 0.01 |
| rs77191587  | 30866630-2 | ATT | -  | 0.95 | 0.87 | 0.98 | 0.71 | -- | 0.03 | 0.01 | 0.01 | -- | 0.01 | 0.04 | 0.01 |

GRCh37/hg19, bp; Abbreviations: EAF, effect allele frequency; -- indicates that a value was not available.

<sup>†</sup> Info score from imputation of SNP data generated via the Illumina Oncoarray

<sup>‡</sup> Info score from imputation of SNP data generated in CCI-EBRT via the AffySNPv6.0 array

<sup>§</sup> Info score from imputation of SNP data generated in GenePARE-I via the AffySNPv6.0 array

<sup>||</sup> Info score from imputation of SNP data generated in RAPPER-I via the Illumina CytoSNP12 array

**Supplementary Table 5.** Association results for credible causal variants identified by fine-scale mapping

| rsid                                                | Non-conditional results <sup>†</sup> |               |      |       |                             | Conditional results |               |      |       |                             |
|-----------------------------------------------------|--------------------------------------|---------------|------|-------|-----------------------------|---------------------|---------------|------|-------|-----------------------------|
|                                                     | HR (95% CI)                          | $P^{\dagger}$ | Q    | $I^2$ | $P_{\text{het}}^{\ddagger}$ | HR (95% CI)         | $P^{\dagger}$ | Q    | $I^2$ | $P_{\text{het}}^{\ddagger}$ |
| chr1:230337180-231337180, associated with hematuria |                                      |               |      |       |                             |                     |               |      |       |                             |
| Signal 1                                            |                                      |               |      |       |                             |                     |               |      |       |                             |
| rs11122572                                          | 1.85 (1.47-2.32)                     | 1.9E-07       | 8.0  | 24.7  | 0.24                        | 1.82 (1.44-2.29)    | 3.9E-07       | 8.5  | 29.2  | 0.20                        |
| rs4846866                                           | 1.90 (1.50-2.40)                     | 1.2E-07       | 8.5  | 29.0  | 0.21                        | 1.87 (1.48-2.38)    | 2.4E-07       | 9.7  | 37.8  | 0.14                        |
| rs61762468                                          | 1.90 (1.50-2.41)                     | 1.3E-07       | 8.1  | 25.9  | 0.23                        | 1.87 (1.47-2.38)    | 2.8E-07       | 9.2  | 34.8  | 0.16                        |
| rs56117713                                          | 1.89 (1.49-2.40)                     | 1.8E-07       | 7.8  | 23.6  | 0.25                        | 1.86 (1.47-2.37)    | 3.7E-07       | 9.0  | 33.1  | 0.18                        |
| rs16852352                                          | 1.89 (1.49-2.40)                     | 1.9E-07       | 7.9  | 23.9  | 0.25                        | 1.86 (1.46-2.37)    | 3.9E-07       | 9.0  | 33.3  | 0.17                        |
| rs11122573                                          | 1.89 (1.49-2.40)                     | 1.9E-07       | 7.8  | 23.2  | 0.25                        | 1.86 (1.46-2.37)    | 3.9E-07       | 8.9  | 32.8  | 0.18                        |
| rs10864770                                          | 1.89 (1.49-2.40)                     | 1.8E-07       | 7.8  | 22.8  | 0.26                        | 1.86 (1.47-2.37)    | 3.7E-07       | 8.9  | 32.5  | 0.18                        |
| rs10864771                                          | 1.89 (1.49-2.40)                     | 1.8E-07       | 7.8  | 22.8  | 0.26                        | 1.86 (1.47-2.37)    | 3.7E-07       | 8.9  | 32.5  | 0.18                        |
| rs11122574                                          | 1.92 (1.43-2.57)                     | 1.1E-05       | 9.3  | 35.7  | 0.16                        | 1.90 (1.42-2.55)    | 1.6E-05       | 10.5 | 42.7  | 0.11                        |
| rs1926723                                           | 1.86 (1.46-2.37)                     | 5.2E-07       | 6.9  | 13.5  | 0.33                        | 1.83 (1.43-2.33)    | 1.1E-06       | 8.0  | 25.2  | 0.24                        |
| rs1926722                                           | 1.86 (1.46-2.37)                     | 5.0E-07       | 6.9  | 13.6  | 0.33                        | 1.83 (1.44-2.33)    | 1.1E-06       | 8.0  | 25.2  | 0.24                        |
| rs11122575                                          | 1.86 (1.46-2.37)                     | 4.8E-07       | 7.0  | 13.9  | 0.32                        | 1.83 (1.44-2.34)    | 1.0E-06       | 8.0  | 25.5  | 0.23                        |
| rs11568056                                          | 1.84 (1.45-2.34)                     | 7.1E-07       | 7.8  | 23.6  | 0.25                        | 1.82 (1.42-2.31)    | 1.4E-06       | 9.0  | 33.2  | 0.17                        |
| rs11122576                                          | 1.76 (1.39-2.23)                     | 3.0E-06       | 7.9  | 24.0  | 0.25                        | 1.74 (1.37-2.21)    | 5.4E-06       | 9.0  | 33.0  | 0.18                        |
| rs11568028                                          | 1.76 (1.39-2.23)                     | 3.0E-06       | 7.9  | 23.9  | 0.25                        | 1.74 (1.37-2.21)    | 5.4E-06       | 8.9  | 32.8  | 0.18                        |
| rs11122578                                          | 1.76 (1.39-2.24)                     | 2.9E-06       | 7.9  | 24.3  | 0.24                        | 1.74 (1.37-2.21)    | 5.3E-06       | 9.0  | 33.1  | 0.18                        |
| rs3789679                                           | 1.78 (1.40-2.26)                     | 3.0E-06       | 7.1  | 15.3  | 0.31                        | 1.75 (1.37-2.23)    | 5.9E-06       | 8.1  | 25.8  | 0.23                        |
| rs9804147                                           | 1.65 (1.32-2.05)                     | 1.1E-05       | 6.4  | 6.6   | 0.38                        | 1.63 (1.31-2.04)    | 1.7E-05       | 6.7  | 10.4  | 0.35                        |
| rs9804153                                           | 1.64 (1.31-2.05)                     | 1.2E-05       | 6.4  | 6.1   | 0.38                        | 1.62 (1.30-2.03)    | 1.8E-05       | 6.6  | 9.6   | 0.36                        |
| rs4028824                                           | 1.64 (1.32-2.05)                     | 1.1E-05       | 6.2  | 3.8   | 0.40                        | 1.63 (1.30-2.03)    | 1.7E-05       | 6.5  | 7.1   | 0.37                        |
| rs10864773                                          | 1.68 (1.33-2.12)                     | 1.1E-05       | 6.1  | 1.9   | 0.41                        | 1.67 (1.32-2.11)    | 1.8E-05       | 6.9  | 13.1  | 0.33                        |
| rs61762467                                          | 1.90 (1.50-2.41)                     | 1.3E-07       | 8.0  | 25.1  | 0.24                        | 1.87 (1.47-2.38)    | 2.8E-07       | 9.2  | 34.4  | 0.17                        |
| Signal 2                                            |                                      |               |      |       |                             |                     |               |      |       |                             |
| rs4846857                                           | 0.66 (0.53-0.82)                     | 1.8E-04       | 21.6 | 72.2  | 0.00                        | 0.65 (0.52-0.81)    | 1.4E-04       | 22.8 | 73.7  | 0.00                        |
| rs79434380                                          | 4.02 (2.14-7.54)                     | 1.5E-05       | 5.5  | 0.0   | 0.48                        | 4.00 (2.12-7.54)    | 1.8E-05       | 5.0  | 0.0   | 0.55                        |
| rs564325629                                         | 4.29 (2.29-8.06)                     | 5.8E-06       | 6.0  | 0.0   | 0.43                        | 4.29 (2.27-8.08)    | 6.9E-06       | 6.3  | 4.4   | 0.39                        |
| rs147121532                                         | 4.43 (2.35-8.33)                     | 3.9E-06       | 6.1  | 1.1   | 0.42                        | 4.42 (2.34-8.34)    | 4.7E-06       | 6.4  | 5.7   | 0.38                        |
| rs28605378                                          | 1.61 (1.23-2.10)                     | 4.9E-04       | 4.3  | 0.0   | 0.64                        | 1.60 (1.22-2.09)    | 6.1E-04       | 4.3  | 0.0   | 0.64                        |
| rs12095859                                          | 1.63 (1.24-2.12)                     | 3.6E-04       | 4.2  | 0.0   | 0.65                        | 1.62 (1.24-2.11)    | 4.5E-04       | 4.2  | 0.0   | 0.65                        |
| rs12091328                                          | 1.62 (1.24-2.11)                     | 3.4E-04       | 4.5  | 0.0   | 0.61                        | 1.61 (1.23-2.10)    | 4.4E-04       | 4.5  | 0.0   | 0.61                        |
| rs12059171                                          | 1.64 (1.26-2.13)                     | 2.5E-04       | 4.5  | 0.0   | 0.61                        | 1.63 (1.25-2.12)    | 3.2E-04       | 4.5  | 0.0   | 0.60                        |

|                                                                  |                  |         |      |      |      |                  |         |     |      |      |
|------------------------------------------------------------------|------------------|---------|------|------|------|------------------|---------|-----|------|------|
| rs12060898                                                       | 1.65 (1.27-2.14) | 1.8E-04 | 4.8  | 0.0  | 0.58 | 1.64 (1.26-2.13) | 2.4E-04 | 4.8 | 0.0  | 0.58 |
| rs75991123                                                       | 1.72 (1.30-2.28) | 1.3E-04 | 7.3  | 18.1 | 0.29 | 1.69 (1.28-2.24) | 2.4E-04 | 7.2 | 17.1 | 0.30 |
| chr5:156903410-157903410, associated with rectal bleeding        |                  |         |      |      |      |                  |         |     |      |      |
| rs17055178                                                       | 1.88 (1.52-2.33) | 4.9E-09 | 3.4  | 0.0  | 0.64 | --               | --      | --  | --   | --   |
| rs13180537                                                       | 1.91 (1.51-2.43) | 8.1E-08 | 5.3  | 6.0  | 0.38 | --               | --      | --  | --   | --   |
| rs78394554                                                       | 1.85 (1.49-2.30) | 2.7E-08 | 4.1  | 0.0  | 0.53 | --               | --      | --  | --   | --   |
| rs34395161                                                       | 1.89 (1.49-2.40) | 1.4E-07 | 5.3  | 6.0  | 0.38 | --               | --      | --  | --   | --   |
| rs35327501                                                       | 1.82 (1.47-2.26) | 5.9E-08 | 3.9  | 0.0  | 0.56 | --               | --      | --  | --   | --   |
| rs4704767                                                        | 1.68 (1.38-2.04) | 2.4E-07 | 3.1  | 0.0  | 0.69 | --               | --      | --  | --   | --   |
| rs35929592                                                       | 1.68 (1.38-2.04) | 2.4E-07 | 3.0  | 0.0  | 0.69 | --               | --      | --  | --   | --   |
| rs35766682                                                       | 1.66 (1.37-2.03) | 4.2E-07 | 3.4  | 0.0  | 0.64 | --               | --      | --  | --   | --   |
| rs10515757                                                       | 1.68 (1.38-2.04) | 2.4E-07 | 3.1  | 0.0  | 0.69 | --               | --      | --  | --   | --   |
| rs35153425                                                       | 1.68 (1.38-2.05) | 2.3E-07 | 3.1  | 0.0  | 0.68 | --               | --      | --  | --   | --   |
| rs17055241                                                       | 1.68 (1.38-2.05) | 2.3E-07 | 3.1  | 0.0  | 0.68 | --               | --      | --  | --   | --   |
| rs1040926                                                        | 1.68 (1.38-2.05) | 2.4E-07 | 3.1  | 0.0  | 0.68 | --               | --      | --  | --   | --   |
| rs13179825                                                       | 1.68 (1.38-2.05) | 2.2E-07 | 3.1  | 0.0  | 0.68 | --               | --      | --  | --   | --   |
| rs13184115                                                       | 1.67 (1.37-2.03) | 3.5E-07 | 3.2  | 0.0  | 0.67 | --               | --      | --  | --   | --   |
| rs17229231                                                       | 1.67 (1.37-2.03) | 3.1E-07 | 2.9  | 0.0  | 0.72 | --               | --      | --  | --   | --   |
| chr9:30366808-31366808, associated with decreased urinary stream |                  |         |      |      |      |                  |         |     |      |      |
| rs10969913                                                       | 4.59 (2.76-7.63) | 4.1E-09 | 11.3 | 55.6 | 0.05 | --               | --      | --  | --   | --   |
| rs7868409                                                        | 4.49 (2.75-7.35) | 2.2E-09 | 8.6  | 42.0 | 0.13 | --               | --      | --  | --   | --   |
| rs10969915                                                       | 4.55 (2.74-7.54) | 4.5E-09 | 9.9  | 49.3 | 0.08 | --               | --      | --  | --   | --   |
| rs10969916                                                       | 4.53 (2.72-7.54) | 6.3E-09 | 9.8  | 48.9 | 0.08 | --               | --      | --  | --   | --   |
| rs1412406                                                        | 4.55 (2.74-7.54) | 4.5E-09 | 9.9  | 49.4 | 0.08 | --               | --      | --  | --   | --   |
| rs539024322                                                      | 4.13 (2.50-6.79) | 2.6E-08 | 10.3 | 51.2 | 0.07 | --               | --      | --  | --   | --   |
| rs10969918                                                       | 4.73 (2.90-7.74) | 5.5E-10 | 8.7  | 42.8 | 0.12 | --               | --      | --  | --   | --   |
| rs112134389                                                      | 4.68 (2.84-7.72) | 1.5E-09 | 8.7  | 42.3 | 0.12 | --               | --      | --  | --   | --   |
| rs111692482                                                      | 4.68 (2.84-7.72) | 1.4E-09 | 8.6  | 42.1 | 0.12 | --               | --      | --  | --   | --   |
| rs10969920                                                       | 4.74 (2.90-7.74) | 5.1E-10 | 8.7  | 42.8 | 0.12 | --               | --      | --  | --   | --   |
| rs10969923                                                       | 4.50 (2.72-7.46) | 5.2E-09 | 10.5 | 52.4 | 0.06 | --               | --      | --  | --   | --   |
| rs73644367                                                       | 4.66 (2.81-7.74) | 2.5E-09 | 8.5  | 52.8 | 0.08 | --               | --      | --  | --   | --   |
| rs73644368                                                       | 4.64 (2.80-7.69) | 2.8E-09 | 8.9  | 44.0 | 0.11 | --               | --      | --  | --   | --   |
| rs10969926                                                       | 4.74 (2.91-7.75) | 4.9E-10 | 8.5  | 52.7 | 0.08 | --               | --      | --  | --   | --   |

\* Single variant summary statistics. Abbreviations: HR, hazard ratio; CI, confidence interval; -- indicates that a value was not available.

† Two-sided  $P_{meta}$  was calculated using a Wald test.

‡ Two-sided  $P_{meta}$  was calculated using a chi-square test.

**Supplementary Table 6.** ENCODE regulatory regions overlapping with credible causal variants.

| rsid                                                | Encode ID                                                                                                                                                                                                                                                                                                                                                                                                                                                                                                                 | Regulatory region_Tissue                                                                                                                                                                                                                                                                                                                                                                                                                                                                                                                                                                                                                                                                                                                                                                                                                                                                                                                                                        |
|-----------------------------------------------------|---------------------------------------------------------------------------------------------------------------------------------------------------------------------------------------------------------------------------------------------------------------------------------------------------------------------------------------------------------------------------------------------------------------------------------------------------------------------------------------------------------------------------|---------------------------------------------------------------------------------------------------------------------------------------------------------------------------------------------------------------------------------------------------------------------------------------------------------------------------------------------------------------------------------------------------------------------------------------------------------------------------------------------------------------------------------------------------------------------------------------------------------------------------------------------------------------------------------------------------------------------------------------------------------------------------------------------------------------------------------------------------------------------------------------------------------------------------------------------------------------------------------|
| chr1:230337180-231337180, associated with hematuria |                                                                                                                                                                                                                                                                                                                                                                                                                                                                                                                           |                                                                                                                                                                                                                                                                                                                                                                                                                                                                                                                                                                                                                                                                                                                                                                                                                                                                                                                                                                                 |
| Signal 1                                            |                                                                                                                                                                                                                                                                                                                                                                                                                                                                                                                           |                                                                                                                                                                                                                                                                                                                                                                                                                                                                                                                                                                                                                                                                                                                                                                                                                                                                                                                                                                                 |
| rs11122572                                          | ENCFF940MJZ                                                                                                                                                                                                                                                                                                                                                                                                                                                                                                               | Enhancer_caudate nucleus                                                                                                                                                                                                                                                                                                                                                                                                                                                                                                                                                                                                                                                                                                                                                                                                                                                                                                                                                        |
| rs4846866                                           | ENCFF940MJZ                                                                                                                                                                                                                                                                                                                                                                                                                                                                                                               | Enhancer_caudate nucleus                                                                                                                                                                                                                                                                                                                                                                                                                                                                                                                                                                                                                                                                                                                                                                                                                                                                                                                                                        |
| rs61762468                                          | ENCFF940MJZ                                                                                                                                                                                                                                                                                                                                                                                                                                                                                                               | Enhancer_caudate nucleus                                                                                                                                                                                                                                                                                                                                                                                                                                                                                                                                                                                                                                                                                                                                                                                                                                                                                                                                                        |
| rs56117713                                          | ENCFF940MJZ                                                                                                                                                                                                                                                                                                                                                                                                                                                                                                               | Enhancer_caudate nucleus                                                                                                                                                                                                                                                                                                                                                                                                                                                                                                                                                                                                                                                                                                                                                                                                                                                                                                                                                        |
| rs16852352                                          | ENCFF131AMT, ENCFF345YBN, ENCFF458GST, ENCFF940MJZ                                                                                                                                                                                                                                                                                                                                                                                                                                                                        | Enhancer_HepG2, Enhancer_HepG2, Enhancer_HepG2, Enhancer_caudate nucleus                                                                                                                                                                                                                                                                                                                                                                                                                                                                                                                                                                                                                                                                                                                                                                                                                                                                                                        |
| rs11122573                                          | ENCFF131AMT, ENCFF345YBN, ENCFF458GST, ENCFF940MJZ                                                                                                                                                                                                                                                                                                                                                                                                                                                                        | Enhancer_HepG2, Enhancer_HepG2, Enhancer_HepG2, Enhancer_caudate nucleus                                                                                                                                                                                                                                                                                                                                                                                                                                                                                                                                                                                                                                                                                                                                                                                                                                                                                                        |
| rs10864770                                          | ENCFF131AMT, ENCFF345YBN, ENCFF458GST, ENCFF940MJZ                                                                                                                                                                                                                                                                                                                                                                                                                                                                        | Enhancer_HepG2, Enhancer_HepG2, Enhancer_HepG2, Enhancer_caudate nucleus                                                                                                                                                                                                                                                                                                                                                                                                                                                                                                                                                                                                                                                                                                                                                                                                                                                                                                        |
| rs10864771                                          | ENCFF131AMT, ENCFF345YBN, ENCFF458GST, ENCFF940MJZ                                                                                                                                                                                                                                                                                                                                                                                                                                                                        | Enhancer_HepG2, Enhancer_HepG2, Enhancer_HepG2, Enhancer_caudate nucleus                                                                                                                                                                                                                                                                                                                                                                                                                                                                                                                                                                                                                                                                                                                                                                                                                                                                                                        |
| rs11122574                                          | ENCFF458GST                                                                                                                                                                                                                                                                                                                                                                                                                                                                                                               | Enhancer_HepG2                                                                                                                                                                                                                                                                                                                                                                                                                                                                                                                                                                                                                                                                                                                                                                                                                                                                                                                                                                  |
| rs1926723                                           | ENCFF458GST                                                                                                                                                                                                                                                                                                                                                                                                                                                                                                               | Enhancer_HepG2                                                                                                                                                                                                                                                                                                                                                                                                                                                                                                                                                                                                                                                                                                                                                                                                                                                                                                                                                                  |
| rs1926722                                           | ENCFF458GST                                                                                                                                                                                                                                                                                                                                                                                                                                                                                                               | Enhancer_HepG2                                                                                                                                                                                                                                                                                                                                                                                                                                                                                                                                                                                                                                                                                                                                                                                                                                                                                                                                                                  |
| rs11122575                                          | ENCFF131AMT, ENCFF345YBN, ENCFF357FRW, ENCFF458GST, ENCFF768HKR, ENCFF940MJZ                                                                                                                                                                                                                                                                                                                                                                                                                                              | Enhancer_HepG2, Enhancer_HepG2, Enhancer_layer of hippocampus, Enhancer_HepG2, Promoter_HepG2, Enhancer_caudate nucleus                                                                                                                                                                                                                                                                                                                                                                                                                                                                                                                                                                                                                                                                                                                                                                                                                                                         |
| rs11568056                                          | ENCFF458GST, ENCFF529FRB, ENCFF603HRN, ENCFF768HKR, ENCFF856JWA, ENCFF925ARX, ENCFF940MJZ                                                                                                                                                                                                                                                                                                                                                                                                                                 | Enhancer_HepG2, Promoter_caudate nucleus, Promoter_liver, Promoter_HepG2, Enhancer_liver, Promoter_HepG2, Enhancer_caudate nucleus                                                                                                                                                                                                                                                                                                                                                                                                                                                                                                                                                                                                                                                                                                                                                                                                                                              |
| rs11122576                                          | ENCFF021ERU, ENCFF131AMT, ENCFF345YBN, ENCFF458GST, ENCFF529FRB, ENCFF603HRN, ENCFF662TKM, ENCFF768HKR, ENCFF856JWA, ENCFF925ARX, ENCFF940MJZ                                                                                                                                                                                                                                                                                                                                                                             | Enhancer_HepG2, Enhancer_middle frontal area 46, Enhancer_HepG2, Enhancer_HepG2, Promoter_caudate nucleus, Promoter_liver, Promoter_heart left ventricle, Promoter_HepG2, Enhancer_liver, Promoter_HepG2, Enhancer_caudate nucleus                                                                                                                                                                                                                                                                                                                                                                                                                                                                                                                                                                                                                                                                                                                                              |
| rs11568028                                          | ENCFF021ERU, ENCFF131AMT, ENCFF345YBN, ENCFF357FRW, ENCFF458GST, ENCFF529FRB, ENCFF603HRN, ENCFF662TKM, ENCFF768HKR, ENCFF856JWA, ENCFF925ARX, ENCFF940MJZ                                                                                                                                                                                                                                                                                                                                                                | Enhancer_HepG2, Enhancer_middle frontal area 46, Enhancer_HepG2, Enhancer_layer of hippocampus, Enhancer_HepG2, Promoter_caudate nucleus, Promoter_liver, Promoter_heart left ventricle, Promoter_HepG2, Enhancer_liver, Promoter_HepG2, Enhancer_caudate nucleus                                                                                                                                                                                                                                                                                                                                                                                                                                                                                                                                                                                                                                                                                                               |
| rs11122578                                          | ENCFF021ERU, ENCFF026HMJ, ENCFF084LBA, ENCFF131AMT, ENCFF138BOV, ENCFF144PJO, ENCFF154VRY, ENCFF169ILY, ENCFF232DYU, ENCFF283LOL, ENCFF305UOC, ENCFF345YBN, ENCFF357FRW, ENCFF407NSM, ENCFF458GST, ENCFF468LNN, ENCFF518VHQ, ENCFF524SKZ, ENCFF529FRB, ENCFF602NDV, ENCFF603HRN, ENCFF608IMQ, ENCFF621WVX, ENCFF662TKM, ENCFF663YMC, ENCFF690YPD, ENCFF699XIX, ENCFF768HKR, ENCFF798VKK, ENCFF809ZVL, ENCFF826LIL, ENCFF856JWA, ENCFF920NZZ, ENCFF925ARX, ENCFF937LPQ, ENCFF940MJZ, ENCFF952DET, ENCFF955CNN, ENCFF978UAS | Enhancer_HepG2, Enhancer_large intestine, Enhancer_middle frontal area 46, Enhancer_myotube, Enhancer_substantia nigra, Enhancer_small intestine, Enhancer_skeletal muscle tissue, Enhancer_pancreas, Enhancer_small intestine, Enhancer_temporal lobe, Promoter_skeletal muscle tissue, Enhancer_IMR-90, Enhancer_HepG2, Enhancer_layer of hippocampus, Promoter_large intestine, Enhancer_HepG2, Enhancer_muscle of trunk, Enhancer_cingulate gyrus, Enhancer_heart left ventricle, Promoter_caudate nucleus, Enhancer_psoas muscle, Promoter_liver, Promoter_skeletal muscle myoblast, Enhancer_angular gyrus, Promoter_heart left ventricle, Enhancer_muscle of trunk, Enhancer_psoas muscle, Enhancer_myotube, Promoter_HepG2, Enhancer_right cardiac atrium, Enhancer_heart right ventricle, Promoter_myotube, Enhancer_liver, Enhancer_muscle of leg, Promoter_HepG2, Enhancer_large intestine, Enhancer_caudate nucleus, Enhancer_adrenal gland, Enhancer_muscle of leg |
| rs3789679                                           | ENCFF212AGQ                                                                                                                                                                                                                                                                                                                                                                                                                                                                                                               | Enhancer_fibroblast of lung                                                                                                                                                                                                                                                                                                                                                                                                                                                                                                                                                                                                                                                                                                                                                                                                                                                                                                                                                     |
| rs9804147                                           | --                                                                                                                                                                                                                                                                                                                                                                                                                                                                                                                        | --                                                                                                                                                                                                                                                                                                                                                                                                                                                                                                                                                                                                                                                                                                                                                                                                                                                                                                                                                                              |

|                                                           |                                                                                                                                                                                                                                                                        |                                                                                                                                                                                                                                                                                                                                                                                                                                                                                                                 |
|-----------------------------------------------------------|------------------------------------------------------------------------------------------------------------------------------------------------------------------------------------------------------------------------------------------------------------------------|-----------------------------------------------------------------------------------------------------------------------------------------------------------------------------------------------------------------------------------------------------------------------------------------------------------------------------------------------------------------------------------------------------------------------------------------------------------------------------------------------------------------|
| rs9804153                                                 | --                                                                                                                                                                                                                                                                     | --                                                                                                                                                                                                                                                                                                                                                                                                                                                                                                              |
| rs4028824                                                 | --                                                                                                                                                                                                                                                                     | --                                                                                                                                                                                                                                                                                                                                                                                                                                                                                                              |
| rs10864773                                                | ENCF940MJZ                                                                                                                                                                                                                                                             | Enhancer_caudate nucleus                                                                                                                                                                                                                                                                                                                                                                                                                                                                                        |
| rs61762467                                                | ENCF033LLU, ENCF154VRY, ENCF447BWN, ENCF875CFO, ENCF937LPQ, ENCF978UAS                                                                                                                                                                                                 | Enhancer_large intestine, Enhancer_mucosa of rectum, Enhancer_pancreas, Enhancer_B cell, Enhancer_B cell, Enhancer_large intestine                                                                                                                                                                                                                                                                                                                                                                              |
| Signal 2                                                  |                                                                                                                                                                                                                                                                        |                                                                                                                                                                                                                                                                                                                                                                                                                                                                                                                 |
| rs4846857                                                 | ENCF518VHQ                                                                                                                                                                                                                                                             | Enhancer_cingulate gyrus                                                                                                                                                                                                                                                                                                                                                                                                                                                                                        |
| rs79434380                                                | --                                                                                                                                                                                                                                                                     | --                                                                                                                                                                                                                                                                                                                                                                                                                                                                                                              |
| rs564325629                                               | --                                                                                                                                                                                                                                                                     | --                                                                                                                                                                                                                                                                                                                                                                                                                                                                                                              |
| rs147121532                                               | ENCF043YPD                                                                                                                                                                                                                                                             | Enhancer_mucosa of rectum                                                                                                                                                                                                                                                                                                                                                                                                                                                                                       |
| rs28605378                                                | ENCF043YPD, ENCF715DPV, ENCF892DRC                                                                                                                                                                                                                                     | Enhancer_mucosa of rectum, Enhancer_stomach, Enhancer_stomach                                                                                                                                                                                                                                                                                                                                                                                                                                                   |
| rs12095859                                                | ENCF013DHK, ENCF033LLU, ENCF043YPD, ENCF084LBA, ENCF183FMS, ENCF412OXP, ENCF519JQV, ENCF605WXQ, ENCF715DPV, ENCF741KDK, ENCF892DRC                                                                                                                                     | Enhancer_MCF-7, Enhancer_mucosa of rectum, Enhancer_mucosa of rectum, Enhancer_substantia nigra, Enhancer_stomach, Promoter_stomach, Enhancer_colonic mucosa, Enhancer_stomach, Enhancer_stomach, Enhancer_sigmoid colon, Enhancer_stomach                                                                                                                                                                                                                                                                      |
| rs12091328                                                | ENCF013DHK, ENCF021ERU, ENCF033LLU, ENCF043YPD, ENCF084LBA, ENCF357FRW, ENCF518VHQ, ENCF621WVX, ENCF715DPV, ENCF741KDK, ENCF892DRC                                                                                                                                     | Enhancer_MCF-7, Enhancer_middle frontal area 46, Enhancer_mucosa of rectum, Enhancer_mucosa of rectum, Enhancer_substantia nigra, Enhancer_layer of hippocampus, Enhancer_cingulate gyrus, Enhancer_angular gyrus, Enhancer_stomach, Enhancer_sigmoid colon, Enhancer_stomach                                                                                                                                                                                                                                   |
| rs12059171                                                | ENCF013DHK, ENCF021ERU, ENCF033LLU, ENCF043YPD, ENCF059PMT, ENCF084LBA, ENCF131AMT, ENCF138BOV, ENCF183FMS, ENCF232DYU, ENCF345YBN, ENCF357FRW, ENCF458GST, ENCF518VHQ, ENCF519JQV, ENCF605WXQ, ENCF621WVX, ENCF715DPV, ENCF741KDK, ENCF892DRC, ENCF937LPQ, ENCF940MJZ | Enhancer_HepG2, Enhancer_MCF-7, Enhancer_middle frontal area 46, Enhancer_mucosa of rectum, Enhancer_mucosa of rectum, Enhancer_lung, Enhancer_substantia nigra, Enhancer_small intestine, Enhancer_stomach, Enhancer_temporal lobe, Enhancer_HepG2, Enhancer_layer of hippocampus, Enhancer_HepG2, Enhancer_cingulate gyrus, Enhancer_colonic mucosa, Enhancer_stomach, Enhancer_angular gyrus, Enhancer_stomach, Enhancer_sigmoid colon, Enhancer_stomach, Enhancer_large intestine, Enhancer_caudate nucleus |
| rs12060898                                                | --                                                                                                                                                                                                                                                                     | --                                                                                                                                                                                                                                                                                                                                                                                                                                                                                                              |
| rs75991123                                                | --                                                                                                                                                                                                                                                                     | --                                                                                                                                                                                                                                                                                                                                                                                                                                                                                                              |
| chr5:156903410-157903410, associated with rectal bleeding |                                                                                                                                                                                                                                                                        |                                                                                                                                                                                                                                                                                                                                                                                                                                                                                                                 |
| rs17055178                                                | --                                                                                                                                                                                                                                                                     | --                                                                                                                                                                                                                                                                                                                                                                                                                                                                                                              |
| rs13180537                                                | --                                                                                                                                                                                                                                                                     | --                                                                                                                                                                                                                                                                                                                                                                                                                                                                                                              |
| rs78394554                                                | ENCF031NTY, ENCF242UFI                                                                                                                                                                                                                                                 | Enhancer_mesendoderm, Enhancer_mesendoderm                                                                                                                                                                                                                                                                                                                                                                                                                                                                      |
| rs34395161                                                | ENCF031NTY, ENCF242UFI                                                                                                                                                                                                                                                 | Enhancer_mesendoderm, Enhancer_mesendoderm                                                                                                                                                                                                                                                                                                                                                                                                                                                                      |
| rs35327501                                                | ENCF937LPQ, ENCF952DET, ENCF953YED, ENCF978UAS                                                                                                                                                                                                                         | Enhancer_large intestine, Enhancer_large intestine, Enhancer_adrenal gland, Enhancer_adrenal gland                                                                                                                                                                                                                                                                                                                                                                                                              |
| rs4704767                                                 | --                                                                                                                                                                                                                                                                     | --                                                                                                                                                                                                                                                                                                                                                                                                                                                                                                              |
| rs35929592                                                | --                                                                                                                                                                                                                                                                     | --                                                                                                                                                                                                                                                                                                                                                                                                                                                                                                              |
| rs35766682                                                | ENCF446JOJ, ENCF952DET, ENCF953YED                                                                                                                                                                                                                                     | Enhancer_esophagus, Enhancer_adrenal gland, Enhancer_adrenal gland                                                                                                                                                                                                                                                                                                                                                                                                                                              |
| rs10515757                                                | ENCF952DET, ENCF953YED                                                                                                                                                                                                                                                 | Enhancer_adrenal gland, Enhancer_adrenal gland                                                                                                                                                                                                                                                                                                                                                                                                                                                                  |
| rs35153425                                                | --                                                                                                                                                                                                                                                                     | --                                                                                                                                                                                                                                                                                                                                                                                                                                                                                                              |
| rs17055241                                                | --                                                                                                                                                                                                                                                                     | --                                                                                                                                                                                                                                                                                                                                                                                                                                                                                                              |
| rs1040926                                                 | ENCF210ALH, ENCF595MLU, ENCF733LQH                                                                                                                                                                                                                                     | Enhancer_keratinocyte, Enhancer_foreskin keratinocyte, Enhancer_keratinocyte                                                                                                                                                                                                                                                                                                                                                                                                                                    |

|            |                                     |                                                                              |
|------------|-------------------------------------|------------------------------------------------------------------------------|
| rs13179825 | ENCFF210ALH,ENCFF595MLU,ENCFF733LQH | Enhancer_keratinocyte, Enhancer_foreskin keratinocyte, Enhancer_keratinocyte |
| rs13184115 | ENCFF210ALH,ENCFF733LQH             | Enhancer_keratinocyte, Enhancer_keratinocyte                                 |
| rs17229231 | --                                  | --                                                                           |

---

Abbreviations: -- indicates that a value was not available.



**Supplementary Table 7.** Top-ranking genes ( $p < 0.001$ ) associated with each toxicity outcome.

| Toxicity by Location        | Gene ID   | Gene symbol         | Gene Type      | No. of SNPs | p-value*              |
|-----------------------------|-----------|---------------------|----------------|-------------|-----------------------|
| Rectal bleeding             |           |                     |                |             |                       |
| chr16                       | 100130958 | <i>SYCE1L</i>       | protein coding | 369         | 3.22x10 <sup>-4</sup> |
| chr16                       | 22879     | <i>MON1B</i>        | protein coding | 330         | 3.40x10 <sup>-4</sup> |
| chr3                        | 55096     | <i>EBLN2</i>        | protein coding | 261         | 5.45x10 <sup>-4</sup> |
| chr4                        | 100874374 | <i>ARHGEF38-IT1</i> | protein coding | 188         | 5.72x10 <sup>-4</sup> |
| chr2                        | 5498      | <i>KIDINS220</i>    | protein coding | 251         | 6.38x10 <sup>-4</sup> |
| chr4                        | 54848     | <i>ARHGEF38</i>     | protein coding | 244         | 6.83x10 <sup>-4</sup> |
| chr5                        | 2559      | <i>GABRA6</i>       | protein coding | 248         | 7.55x10 <sup>-4</sup> |
| chr2                        | 151254    | <i>ALS2CR11</i>     | protein coding | 274         | 7.94x10 <sup>-4</sup> |
| chr6                        | 168002    | <i>DACT2</i>        | protein coding | 439         | 8.27x10 <sup>-4</sup> |
| chr3                        | 151987    | <i>PPP4R2</i>       | protein coding | 482         | 8.30x10 <sup>-4</sup> |
| chr7                        | 79571     | <i>GCC1</i>         | protein coding | 126         | 9.90x10 <sup>-4</sup> |
| Increased urinary frequency |           |                     |                |             |                       |
| chr14                       | 145567    | <i>TTC7B</i>        | ncRNA          | 1031        | 9.37x10 <sup>-5</sup> |
| chr14                       | 9623      | <i>TCL1B</i>        | protein coding | 418         | 1.27x10 <sup>-4</sup> |
| chr20                       | 63935     | <i>PCIF1</i>        | protein coding | 162         | 1.86x10 <sup>-4</sup> |
| chr15                       | 9836      | <i>LCMT2</i>        | protein coding | 154         | 3.16x10 <sup>-4</sup> |
| chr14                       | 27004     | <i>TCL6</i>         | ncRNA          | 465         | 3.24x10 <sup>-4</sup> |
| chr20                       | 5360      | <i>PLTP</i>         | protein coding | 193         | 3.50x10 <sup>-4</sup> |
| chr15                       | 161823    | <i>ADAL</i>         | protein coding | 179         | 3.73x10 <sup>-4</sup> |
| chr12                       | 8738      | <i>CRADD</i>        | protein coding | 34          | 4.56x10 <sup>-4</sup> |
| chr15                       | 116179    | <i>TGM7</i>         | protein coding | 166         | 4.75x10 <sup>-4</sup> |
| chr19                       | 284382    | <i>ACTL9</i>        | protein coding | 229         | 5.58x10 <sup>-4</sup> |
| chr15                       | 146050    | <i>ZSCAN29</i>      | protein coding | 169         | 6.46x10 <sup>-4</sup> |
| chr22                       | 266697    | <i>POM121L4P</i>    | pseudo         | 228         | 6.51x10 <sup>-4</sup> |
| chr13                       | 196541    | <i>METTL21C</i>     | protein coding | 309         | 6.91x10 <sup>-4</sup> |
| chr20                       | 5476      | <i>CTSA</i>         | protein coding | 178         | 7.05x10 <sup>-4</sup> |
| chr22                       | 84222     | <i>TMEM191A</i>     | pseudo         | 222         | 7.24x10 <sup>-4</sup> |
| chr22                       | 5297      | <i>PI4KA</i>        | protein coding | 500         | 7.90x10 <sup>-4</sup> |
| chr22                       | 3053      | <i>SERPIND1</i>     | protein coding | 228         | 8.42x10 <sup>-4</sup> |
| chr15                       | 27229     | <i>TUBGCP4</i>      | protein coding | 214         | 9.36x10 <sup>-4</sup> |
| chr17                       | 100505576 | <i>LINC00672</i>    | ncRNA          | 175         | 9.42x10 <sup>-4</sup> |
| chr4                        | 6452      | <i>SH3BP2</i>       | protein coding | 274         | 9.76x10 <sup>-4</sup> |
| chr20                       | 140825    | <i>NEURL2</i>       | protein coding | 168         | 9.92x10 <sup>-4</sup> |
| chr12                       | 225       | <i>ABCD2</i>        | protein coding | 6           | 9.99x10 <sup>-4</sup> |
| Decreased urinary stream    |           |                     |                |             |                       |
| chr16                       | 54925     | <i>ZSCAN32</i>      | protein coding | 360         | 1.14x10 <sup>-5</sup> |
| chr16                       | 7727      | <i>ZNF174</i>       | protein coding | 307         | 1.20x10 <sup>-5</sup> |
| chr14                       | 26257     | <i>NKX2-8</i>       | protein coding | 253         | 1.24x10 <sup>-5</sup> |
| chr16                       | 100463285 | <i>MTRNR2L4</i>     | protein coding | 292         | 2.00x10 <sup>-5</sup> |
| chr16                       | 4993      | <i>OR2C1</i>        | ncRNA          | 286         | 2.29x10 <sup>-5</sup> |
| chr16                       | 79903     | <i>NAA60</i>        | protein coding | 357         | 6.89x10 <sup>-5</sup> |
| chr16                       | 146434    | <i>ZNF597</i>       | pseudo         | 337         | 6.95x10 <sup>-5</sup> |
| chr16                       | 7627      | <i>ZNF75A</i>       | protein coding | 243         | 7.06x10 <sup>-5</sup> |
| chr9                        | 100616351 | <i>MIR4670</i>      | protein coding | 139         | 8.25x10 <sup>-5</sup> |
| chr15                       | 8924      | <i>HERC2</i>        | protein coding | 104         | 8.41x10 <sup>-5</sup> |

|           |           |                     |                |      |           |
|-----------|-----------|---------------------|----------------|------|-----------|
| chr9      | 2649      | <i>NR6A1</i>        | protein coding | 170  | 8.72x10-5 |
| chr9      | 1842      | <i>ECM2</i>         | protein coding | 186  | 9.69x10-5 |
| chr9      | 2516      | <i>NR5A1</i>        | protein coding | 125  | 1.19x10-4 |
| chr14     | 4140      | <i>MARK3</i>        | protein coding | 471  | 1.24x10-4 |
| chr14     | 7080      | <i>NKX2-1</i>       | protein coding | 164  | 1.28x10-4 |
| chr9      | 347088    | <i>GPR144</i>       | protein coding | 149  | 1.59x10-4 |
| chr11     | 100616311 | <i>MIR3973</i>      | ncRNA          | 157  | 1.65x10-4 |
| chr14     | 5083      | <i>PAX9</i>         | protein coding | 268  | 1.67x10-4 |
| chr2      | 3635      | <i>INPP5D</i>       | protein coding | 689  | 1.76x10-4 |
| chr14     | 253970    | <i>SFTA3</i>        | protein coding | 220  | 1.89x10-4 |
| chr9      | 54829     | <i>ASPN</i>         | protein coding | 138  | 2.54x10-4 |
| chr9      | 401541    | <i>CENPP</i>        | protein coding | 389  | 2.68x10-4 |
| chr9      | 100379345 | <i>MIR181A2HG</i>   | ncRNA          | 48   | 2.76x10-4 |
| chr9      | 406954    | <i>MIR181A2</i>     | ncRNA          | 39   | 3.15x10-4 |
| chr9      | 406956    | <i>MIR181B2</i>     | ncRNA          | 39   | 3.19x10-4 |
| chr9      | 23511     | <i>NUP188</i>       | protein coding | 117  | 4.64x10-4 |
| chr9      | 56904     | <i>SH3GLB2</i>      | protein coding | 70   | 4.71x10-4 |
| chr14     | 1152      | <i>CKB</i>          | protein coding | 210  | 4.76x10-4 |
| chr9      | 22845     | <i>DOLK</i>         | protein coding | 78   | 5.84x10-4 |
| chr9      | 4958      | <i>OMD</i>          | protein coding | 110  | 5.88x10-4 |
| chr19     | 728752    | <i>LOC728752</i>    | ncRNA          | 230  | 6.31x10-4 |
| chr9      | 254295    | <i>PHYHD1</i>       | protein coding | 90   | 6.47x10-4 |
| chr9      | 169611    | <i>OLFML2A</i>      | protein coding | 161  | 6.90x10-4 |
| chr3      | 401097    | <i>C3orf80</i>      | protein coding | 105  | 7.15x10-4 |
| chr3      | 255758    | <i>TCTEX1D2</i>     | protein coding | 300  | 8.92x10-4 |
| chr18     | 54808     | <i>DYM</i>          | protein coding | 973  | 9.18x10-4 |
| chr9      | 4969      | <i>OGN</i>          | protein coding | 115  | 9.29x10-4 |
| chr9      | 56262     | <i>LRRRC8A</i>      | protein coding | 106  | 9.49x10-4 |
| Hematuria |           |                     |                |      |           |
| chr6      | 94120     | <i>SYTL3</i>        | protein coding | 595  | 2.82x10-5 |
| chr6      | 101409257 | <i>EZR-AS1</i>      | ncRNA          | 309  | 5.86x10-5 |
| chr1      | 183       | <i>AGT</i>          | protein coding | 370  | 7.91x10-5 |
| chr6      | 202459    | <i>OSTCP1</i>       | pseudo         | 301  | 8.65x10-5 |
| chr6      | 7430      | <i>EZR</i>          | protein coding | 463  | 9.48x10-5 |
| chr4      | 80144     | <i>FRAS1</i>        | protein coding | 1570 | 1.19x10-4 |
| chr6      | 100500851 | <i>MIR3918</i>      | ncRNA          | 333  | 1.38x10-4 |
| chr20     | 650       | <i>BMP2</i>         | protein coding | 227  | 2.76x10-4 |
| chr1      | 22796     | <i>COG2</i>         | protein coding | 425  | 2.98x10-4 |
| chr11     | 63901     | <i>FAM111A</i>      | protein coding | 106  | 3.58x10-4 |
| chr5      | 23037     | <i>PDZD2</i>        | protein coding | 1522 | 3.61x10-4 |
| chr15     | 283726    | <i>FAM154B</i>      | protein coding | 145  | 4.05x10-4 |
| chr7      | 100288524 | <i>LOC100288524</i> | ncRNA          | 486  | 4.38x10-4 |
| chr10     | 55130     | <i>ARMC4</i>        | protein coding | 492  | 5.27x10-4 |
| chr11     | 374393    | <i>FAM111B</i>      | protein coding | 131  | 5.54x10-4 |
| chr1      | 10753     | <i>CAPN9</i>        | protein coding | 486  | 6.46x10-4 |
| chr15     | 390660    | <i>LOC390660</i>    | pseudo         | 94   | 6.86x10-4 |
| chr8      | 286097    | <i>MICU3</i>        | protein coding | 463  | 7.01x10-4 |
| chr17     | 6426      | <i>SRSF1</i>        | protein coding | 91   | 7.34x10-4 |
| chr17     | 1277      | <i>COL1A1</i>       | protein coding | 204  | 7.36x10-4 |
| chr15     | 79631     | <i>EFTUD1</i>       | protein coding | 413  | 7.38x10-4 |
| chr11     | 23220     | <i>DTX4</i>         | protein coding | 174  | 7.99x10-4 |

|       |           |                  |                |     |                       |
|-------|-----------|------------------|----------------|-----|-----------------------|
| chr12 | 6579      | <i>SLCO1A2</i>   | protein coding | 31  | 8.53x10 <sup>-4</sup> |
| chr8  | 100874052 | <i>LINC00534</i> | ncRNA          | 509 | 8.65x10 <sup>-4</sup> |
| chr15 | 161742    | <i>SPRED1</i>    | protein coding | 557 | 9.56x10 <sup>-4</sup> |
| chr12 | 10599     | <i>SLCO1B1</i>   | protein coding | 26  | 9.80x10 <sup>-4</sup> |

---

\* Two-sided P<sub>meta</sub> was calculated using a Wald test.

**Supplementary Table 8.** Pathway scores for top-ranking pathways (chi-square  $p < 0.05$ ) associated with each toxicity outcome.

| Toxicity        | Pathway Name                                                             | chi2 pvalue*          | empirical pvalue†     |
|-----------------|--------------------------------------------------------------------------|-----------------------|-----------------------|
| Rectal bleeding | REACTOME_PEROXISOMAL_LIPID_METABOLISM                                    | 6.04x10 <sup>-4</sup> | 6.70x10 <sup>-4</sup> |
|                 | BIOCARTA_PYK2_PATHWAY                                                    | 0.006                 | 0.005                 |
|                 | REACTOME_GABA_RECEPTOR_ACTIVATION                                        | 0.009                 | 0.007                 |
|                 | REACTOME_TRNA_AMINOACYLATION                                             | 0.01                  | 0.01                  |
|                 | KEGG_PEROXISOME                                                          | 0.01                  | 0.01                  |
|                 | BIOCARTA_GPCR_PATHWAY                                                    | 0.01                  | 0.01                  |
|                 | REACTOME_INWARDLY_RECTIFYING_K_CHANNELS                                  | 0.01                  | 0.009                 |
|                 | BIOCARTA_INTEGRIN_PATHWAY                                                | 0.01                  | 0.01                  |
|                 | BIOCARTA_CHEMICAL_PATHWAY                                                | 0.01                  | 0.01                  |
|                 | BIOCARTA FMLP_PATHWAY                                                    | 0.01                  | 0.01                  |
|                 | REACTOME_TRANSCRIPTIONAL_REGULATION_OF_WHITE_ADIPOCYTE_DIFFERENTIATION*  | 0.01                  | 0.02                  |
|                 | REACTOME_CA_DEPENDENT_EVENTS                                             | 0.01                  | 0.01                  |
|                 | BIOCARTA_AT1R_PATHWAY                                                    | 0.01                  | 0.01                  |
|                 | BIOCARTA_BCR_PATHWAY                                                     | 0.02                  | 0.01                  |
|                 | REACTOME_A_TETRASACCHARIDE_LINKER_SEQUENCE_IS_REQUIRED_FOR_GAG_SYNTHESIS | 0.02                  | 0.01                  |
|                 | BIOCARTA_UCALPAIN_PATHWAY†                                               | 0.02                  | 0.02                  |
|                 | KEGG_GLYCOSPHINGOLIPID_BIOSYNTHESIS_GLOBO_SERIES                         | 0.02                  | 0.02                  |
|                 | REACTOME_OPIOID_SIGNALLING                                               | 0.02                  | 0.02                  |
|                 | BIOCARTA_CBL_PATHWAY                                                     | 0.02                  | 0.02                  |
|                 | BIOCARTA_TNFR1_PATHWAY                                                   | 0.02                  | 0.02                  |
|                 | BIOCARTA_FCER1_PATHWAY                                                   | 0.02                  | 0.02                  |
|                 | BIOCARTA_ECM_PATHWAY‡                                                    | 0.03                  | 0.03                  |
|                 | REACTOME_CIRCADIAN_REPRESSION_OF_EXPRESSION_BY_REV_ERBA                  | 0.03                  | 0.03                  |
|                 | REACTOME_ARMS_MEDIATED_ACTIVATION                                        | 0.03                  | 0.04                  |
|                 | REACTOME_CYTOSOLIC_TRNA_AMINOACYLATION                                   | 0.03                  | 0.03                  |
|                 | REACTOME_MEIOTIC_RECOMBINATION                                           | 0.03                  | 0.03                  |
|                 | BIOCARTA_FAS_PATHWAY                                                     | 0.03                  | 0.03                  |
|                 | REACTOME_GABA_B_RECEPTOR_ACTIVATION                                      | 0.03                  | 0.03                  |
|                 | BIOCARTA_IL3_PATHWAY                                                     | 0.03                  | 0.03                  |
|                 | KEGG_TYPE_II_DIABETES_MELLITUS†                                          | 0.03                  | 0.03                  |
|                 | BIOCARTA_TCR_PATHWAY                                                     | 0.03                  | 0.03                  |
|                 | REACTOME_PLC_BETA_MEDIATED_EVENTS                                        | 0.03                  | 0.03                  |
|                 | REACTOME_GLYCOLYSIS                                                      | 0.03                  | 0.03                  |
|                 | KEGG_NATURAL_KILLER_CELL_MEDIATED_CYTOTOXICITY                           | 0.03                  | 0.03                  |
|                 | BIOCARTA_AGR_PATHWAY                                                     | 0.03                  | 0.03                  |
|                 | BIOCARTA_NUCLEARRS_PATHWAY                                               | 0.04                  | 0.03                  |
|                 | REACTOME_PROSTACYCLIN_SIGNALLING_THROUGH_PROSTACYCLIN_RECEPTOR           | 0.04                  | 0.03                  |
|                 | KEGG_CARDIAC_MUSCLE_CONTRACTION                                          | 0.04                  | 0.04                  |
|                 | KEGG_AMINOACYL_TRNA_BIOSYNTHESIS                                         | 0.04                  | 0.04                  |

|                                            |                                                                                     |       |       |
|--------------------------------------------|-------------------------------------------------------------------------------------|-------|-------|
| Rectal bleeding                            | REACTOME_RORA_ACTIVATES_CIRCADIAN_EXPRESSION                                        | 0.04  | 0.05  |
|                                            | BIOCARTA_MCALPAIN_PATHWAY                                                           | 0.04  | 0.04  |
|                                            | REACTOME_DAG_AND_IP3_SIGNALING                                                      | 0.04  | 0.04  |
|                                            | KEGG_P53_SIGNALING_PATHWAY                                                          | 0.04  | 0.04  |
|                                            | BIOCARTA_NDKDYNAMIN_PATHWAY <sup>‡</sup>                                            | 0.04  | 0.04  |
|                                            | REACTOME_ERKS_ARE_INACTIVATED                                                       | 0.04  | 0.04  |
|                                            | REACTOME_FACILITATIVE_NA_INDEPENDENT_GLUCOSE_TRANSPORTERS                           | 0.04  | 0.04  |
|                                            | BIOCARTA_NOS1_PATHWAY                                                               | 0.04  | 0.04  |
|                                            | BIOCARTA_RACCYCD_PATHWAY                                                            | 0.04  | 0.04  |
|                                            | BIOCARTA_GABA_PATHWAY                                                               | 0.04  | 0.05  |
|                                            | REACTOME_INHIBITION_OF_VOLTAGE_GATED_CA2_CHANNELS_VIA_GBETA_GAMMA_SUBUNITS          | 0.04  | 0.04  |
|                                            | BIOCARTA_THELPER_PATHWAY                                                            | 0.04  | 0.05  |
|                                            | BIOCARTA_DREAM_PATHWAY                                                              | 0.05  | 0.04  |
|                                            | BIOCARTA_CERAMIDE_PATHWAY                                                           | 0.05  | 0.05  |
|                                            | BIOCARTA_FREE_PATHWAY                                                               | 0.05  | 0.04  |
|                                            | REACTOME_GLUCAGON_SIGNALING_IN_METABOLIC_REGULATION                                 | 0.05  | 0.05  |
|                                            | BIOCARTA_EGFR_SMRTE_PATHWAY                                                         | 0.05  | 0.05  |
|                                            | REACTOME_BINDING_AND_ENTRY_OF_HIV_VIRION                                            | 0.05  | 0.05  |
| REACTOME_MITOCHONDRIAL_TRNA_AMINOACYLATION | 0.05                                                                                | 0.05  |       |
| BIOCARTA_NFAT_PATHWAY <sup>†</sup>         | 0.05                                                                                | 0.05  |       |
| Increased urinary frequency                | REACTOME_PURINE_METABOLISM                                                          | 0.001 | 0.001 |
|                                            | REACTOME_BASIGIN_INTERACTIONS <sup>§</sup>                                          | 0.005 | 0.004 |
|                                            | REACTOME_PURINE_CATABOLISM                                                          | 0.006 | 0.005 |
|                                            | REACTOME_APOPTOSIS_INDUCED_DNA_FRAGMENTATION                                        | 0.009 | 0.009 |
|                                            | KEGG_SELENOAMINO_ACID_METABOLISM                                                    | 0.01  | 0.01  |
|                                            | REACTOME_VOLTAGE_GATED_POTASSIUM_CHANNELS                                           | 0.01  | 0.01  |
|                                            | REACTOME_STRIATED_MUSCLE_CONTRACTION                                                | 0.02  | 0.01  |
|                                            | REACTOME_ABACAVIR_TRANSPORT_AND_METABOLISM                                          | 0.02  | 0.02  |
|                                            | REACTOME_TRANSCRIPTIONAL_REGULATION_OF_WHITE_ADIPOCYTE_DIFFERENTIATION <sup>*</sup> | 0.02  | 0.02  |
|                                            | REACTOME_PURINE_SALVAGE                                                             | 0.02  | 0.02  |
|                                            | REACTOME_CELL_SURFACE_INTERACTIONS_AT_THE_VASCULAR_WALL                             | 0.02  | 0.02  |
|                                            | REACTOME_ETHANOL_OXIDATION                                                          | 0.02  | 0.02  |
|                                            | REACTOME_CD28_DEPENDENT_VAV1_PATHWAY                                                | 0.02  | 0.02  |
|                                            | REACTOME_ALPHA_LINOLENIC_ACID_ALA_METABOLISM                                        | 0.02  | 0.03  |
|                                            | KEGG_PURINE_METABOLISM                                                              | 0.03  | 0.02  |
| KEGG_INOSITOL_PHOSPHATE_METABOLISM         | 0.03                                                                                | 0.03  |       |
| KEGG_VIRAL_MYOCARDITIS                     | 0.03                                                                                | 0.03  |       |
| Increased urinary frequency                | REACTOME_N_GLYCAN_TRIMMING_IN_THE_ER_AND_CALNEXIN_CALRETICULIN_CYCLE                | 0.03  | 0.03  |
|                                            | REACTOME_SIGNAL_TRANSDUCTION_BY_L1                                                  | 0.03  | 0.03  |
|                                            | KEGG_RETINOL_METABOLISM                                                             | 0.03  | 0.03  |
|                                            | REACTOME_CALNEXIN_CALRETICULIN_CYCLE                                                | 0.04  | 0.04  |
|                                            | REACTOME_HDL_MEDIATED_LIPID_TRANSPORT                                               | 0.04  | 0.04  |
|                                            | REACTOME_CS_DS_DEGRADATION                                                          | 0.04  | 0.03  |

|                |                                                                           |       |       |
|----------------|---------------------------------------------------------------------------|-------|-------|
|                | BIOCARTA_DNAFRAGMENT_PATHWAY                                              | 0.04  | 0.04  |
|                | BIOCARTA_VDR_PATHWAY                                                      | 0.04  | 0.04  |
|                | REACTOME_COPI_MEDIATED_TRANSPORT                                          | 0.04  | 0.04  |
|                | BIOCARTA_CDK5_PATHWAY                                                     | 0.04  | 0.05  |
|                | KEGG_RENIN_ANGIOTENSIN_SYSTEM                                             | 0.05  | 0.05  |
| Decreased      | REACTOME_CHROMOSOME_MAINTENANCE                                           | 0.005 | 0.005 |
| urinary stream | REACTOME_CHOLESTEROL_BIOSYNTHESIS                                         | 0.006 | 0.009 |
|                | REACTOME_CASPASE_MEDIATED_CLEAVAGE_OF_CYTOSKELETAL_PROTEINS               | 0.01  | 0.01  |
|                | REACTOME_MITOTIC_PROMETAPHASE                                             | 0.01  | 0.009 |
|                | REACTOME_MEIOTIC_SYNAPSIS                                                 | 0.01  | 0.02  |
|                | REACTOME_XENOBIOTICS                                                      | 0.01  | 0.02  |
|                | BIOCARTA_CDMAC_PATHWAY                                                    | 0.01  | 0.02  |
|                | REACTOME_MITOTIC_M_M_G1_PHASES                                            | 0.02  | 0.01  |
|                | BIOCARTA_BIOPEPTIDES_PATHWAY <sup>  </sup>                                | 0.02  | 0.02  |
|                | REACTOME_CELL_CYCLE                                                       | 0.02  | 0.02  |
|                | REACTOME_DNA_REPLICATION                                                  | 0.02  | 0.02  |
|                | REACTOME_DEPOSITION_OF_NEW_CENPA_CONTAINING_NUCLEOSOMES_AT_THE_CENTROMERE | 0.02  | 0.01  |
|                | REACTOME_OLFACTORY_SIGNALING_PATHWAY                                      | 0.02  | 0.01  |
|                | REACTOME_CELL_CYCLE_MITOTIC                                               | 0.03  | 0.03  |
|                | REACTOME_RAF_MAP_KINASE_CASCADE                                           | 0.03  | 0.04  |
|                | REACTOME_SYNTHESIS_OF_PC                                                  | 0.03  | 0.03  |
|                | BIOCARTA_ECM_PATHWAY <sup>‡</sup>                                         | 0.03  | 0.04  |
|                | KEGG_FC_EPSILON_RI_SIGNALING_PATHWAY                                      | 0.04  | 0.03  |
|                | KEGG_FC_GAMMA_R_MEDIATED_PHAGOCYTOSIS                                     | 0.04  | 0.03  |
|                | REACTOME_CYTOKINE_SIGNALING_IN_IMMUNE_SYSTEM <sup>  </sup>                | 0.04  | 0.04  |
|                | BIOCARTA_NDKDYNAMIN_PATHWAY <sup>‡</sup>                                  | 0.04  | 0.04  |
|                | KEGG_MELANOGENESIS                                                        | 0.04  | 0.05  |
|                | REACTOME_SHC_RELATED_EVENTS                                               | 0.04  | 0.05  |
|                | REACTOME_TRANSPORT_OF_RIBONUCLEOPROTEINS_INTO_THE_HOST_NUCLEUS            | 0.05  | 0.04  |
|                | REACTOME_AMINE_LIGAND_BINDING_RECEPTORS                                   | 0.05  | 0.05  |
|                | REACTOME_SIGNALING_BY_ILS                                                 | 0.05  | 0.05  |
|                | BIOCARTA_RHO_PATHWAY                                                      | 0.05  | 0.05  |
|                | REACTOME_METABOLISM_OF_RNA                                                | 0.05  | 0.05  |
| Hematuria      | REACTOME_PLATELET_ADHESION_TO_EXPOSED_COLLAGEN                            | 0.002 | 0.002 |
|                | REACTOME_INTERFERON_ALPHA_BETA_SIGNALING                                  | 0.004 | 0.005 |
|                | BIOCARTA_BIOPEPTIDES_PATHWAY <sup>  </sup>                                | 0.007 | 0.005 |
|                | REACTOME_L1CAM_INTERACTIONS                                               | 0.008 | 0.005 |
|                | BIOCARTA_ALK_PATHWAY                                                      | 0.008 | 0.008 |
|                | REACTOME_REGULATION_OF_IFNA_SIGNALING                                     | 0.009 | 0.009 |
|                | REACTOME_ACYL_CHAIN_REMODELLING_OF_PI                                     | 0.01  | 0.01  |
|                | BIOCARTA_UCALPAIN_PATHWAY <sup>†</sup>                                    | 0.01  | 0.007 |
|                | REACTOME_RECYCLING_PATHWAY_OF_L1                                          | 0.01  | 0.008 |
|                | BIOCARTA_ACE2_PATHWAY                                                     | 0.02  | 0.01  |
|                | KEGG_TYPE_II_DIABETES_MELLITUS <sup>†</sup>                               | 0.02  | 0.02  |

|                                                                      |      |      |
|----------------------------------------------------------------------|------|------|
| REACTOME_ACYL_CHAIN_REMODELLING_OF_PG                                | 0.02 | 0.02 |
| REACTOME_REGULATION_OF_BETA_CELL_DEVELOPMENT                         | 0.02 | 0.02 |
| REACTOME_ACTIVATION_OF_BH3_ONLY_PROTEINS                             | 0.02 | 0.02 |
| REACTOME_REGULATION_OF_IFNG_SIGNALING                                | 0.02 | 0.02 |
| KEGG_JAK_STAT_SIGNALING_PATHWAY                                      | 0.02 | 0.02 |
| REACTOME_GROWTH_HORMONE_RECEPTOR_SIGNALING                           | 0.02 | 0.02 |
| REACTOME_ACTIVATED_NOTCH1_TRANSMITS_SIGNAL_TO_THE_NUCLEUS            | 0.03 | 0.02 |
| BIOCARTA_NFAT_PATHWAY <sup>†</sup>                                   | 0.03 | 0.02 |
| KEGG_VASCULAR_SMOOTH_MUSCLE_CONTRACTION                              | 0.03 | 0.03 |
| REACTOME_SIGNALING_BY_ACTIVATED_POINT_MUTANTS_OF_FGFR1               | 0.03 | 0.03 |
| REACTOME_RNA_POL_I_TRANSCRIPTION                                     | 0.03 | 0.03 |
| REACTOME_REGULATION_OF_GENE_EXPRESSION_IN_BETA_CELLS                 | 0.04 | 0.04 |
| REACTOME_SYNTHESIS_OF_PA                                             | 0.04 | 0.04 |
| REACTOME_TRANSPORT_OF_ORGANIC_ANIONS                                 | 0.04 | 0.04 |
| REACTOME_E2F_ENABLED_INHIBITION_OF_PRE_REPLICATION_COMPLEX_FORMATION | 0.04 | 0.05 |
| REACTOME_AXON_GUIDANCE                                               | 0.04 | 0.03 |
| REACTOME_RNA_POL_I_TRANSCRIPTION_INITIATION                          | 0.04 | 0.04 |
| REACTOME_BASIGIN_INTERACTIONS <sup>‡</sup>                           | 0.04 | 0.04 |
| BIOCARTA_CARDIACEGF_PATHWAY                                          | 0.05 | 0.03 |
| REACTOME_SIGNALING_BY_BMP                                            | 0.05 | 0.04 |
| BIOCARTA_PTC1_PATHWAY                                                | 0.05 | 0.05 |
| REACTOME_ACYL_CHAIN_REMODELLING_OF_PS                                | 0.05 | 0.05 |
| REACTOME_INTRINSIC_PATHWAY_FOR_APOPTOSIS                             | 0.05 | 0.05 |
| REACTOME_CYTOKINE_SIGNALING_IN_IMMUNE_SYSTEM <sup>  </sup>           | 0.05 | 0.05 |

---

<sup>†</sup> Two-sided pvalue was calculated using a chi-square test.

<sup>†</sup> Following methods in [23], a Monte Carlo estimate of the p-value is obtained by sampling random gene sets of size and calculating the fraction of sets reaching a higher score than gene set of the given pathway.

<sup>‡</sup> Pathway is associated with both rectal bleeding and increased urinary frequency

<sup>§</sup> Pathway is associated with both rectal bleeding and hematuria

<sup>||</sup> Pathway is associated with both rectal bleeding and decreased urinary stream

<sup>¶</sup> Pathway is associated with both increased urinary frequency and hematuria

<sup>#</sup> Pathway is associated with both decreased urinary stream and hematuria

**Supplementary Table 9.** Evaluation of radiotoxicity risk variants in Japanese cohorts treated with either external beam photon therapy (PRRG-photon), permanent seed brachytherapy with or without external beam photon therapy (NTMC) or carbon ion therapy (PRRG-Cion).

| SNP                                                                   | Toxicity Outcome                                                                             | Info <sup>*</sup> | Effect size (95% CI)     |                          |                          |
|-----------------------------------------------------------------------|----------------------------------------------------------------------------------------------|-------------------|--------------------------|--------------------------|--------------------------|
|                                                                       |                                                                                              |                   | In NTMC (N=254)          | In PRRG-photon (N=170)   | In PRRG-Cion (N=538)     |
| rs17055178<br>chr5:157,403,410 <sup>†</sup><br>MAF <sup>‡</sup> 0.07  | Time to onset of grade 2+ rectal bleeding                                                    | 0.98              | NA <sup>§</sup>          | NA <sup>§</sup>          | NA <sup>§</sup>          |
| rs10969913<br>chr9:30,866,808 <sup>b</sup><br>MAF <sup>‡</sup> 0.37   | Time to onset of grade 2+ decreased urinary stream <sup>  </sup>                             | 0.98              | HR = 1.15 (0.82 to 1.61) | HR = 1.83 (0.44 to 7.68) | HR = 0.90 (0.36 to 2.26) |
| rs11122573<br>chr1:230,837,180 <sup>†</sup><br>MAF <sup>‡</sup> 0.31  | Time to onset of grade 2+ hematuria <sup>¶</sup>                                             | 0.99              | NA <sup>#</sup>          | NA <sup>**</sup>         | HR = 1.18 (0.53 to 2.61) |
| rs147121532<br>chr1:230,451,849 <sup>†</sup><br>MAF <sup>‡</sup> 0.09 | Time to onset of grade 2+ hematuria <sup>¶</sup>                                             | 0.85              | NA <sup>#</sup>          | NA <sup>**</sup>         | HR = 1.52 (0.48 to 4.84) |
| rs17599026<br>chr5:137,763,798 <sup>†</sup><br>MAF <sup>‡</sup> 0.11  | Presence of grade 1+ increased urinary frequency at 2 years after radiotherapy <sup>††</sup> | 0.84              | OR = 1.13 (0.49 to 2.64) | OR = 1.51 (0.56 to 4.05) | OR = 0.63 (0.27 to 1.49) |
| rs7720298<br>chr5:13,858,328 <sup>†</sup><br>MAF <sup>‡</sup> 0.20    | Presence of grade 1+ decreased urinary stream at 2 years after radiotherapy <sup>††</sup>    | 0.97              | OR = 1.42 (0.77 to 2.63) | NA <sup>§§</sup>         | NA <sup>§§</sup>         |
| rs1801516<br>chr11:108,175,462 <sup>†</sup><br>MAF <sup>‡</sup> 0.00  | Overall toxicity                                                                             | NA <sup>   </sup> | NA <sup>   </sup>        | NA <sup>   </sup>        | NA <sup>   </sup>        |
| rs7582141<br>chr2:159,899,489 <sup>†</sup><br>MAF <sup>‡</sup> 0.12   | Overall toxicity <sup>¶¶</sup>                                                               | 0.99              | OR = 1.07 (0.53 to 2.16) | OR = 0.97 (0.79 to 1.18) | OR = 0.95 (0.90 to 1.01) |

<sup>\*</sup> Imputation info score values are from the oncoarray. Abbreviations: SNP, single nucleotide polymorphism; CI, confidence interval; MAF, minor allele frequency; HR, hazard ratio; OR, odds ratio; NA, not analyzed.

<sup>†</sup> Base position according to Genome Reference Consortium Human Build 37 (hg19).

<sup>‡</sup> Minor allele frequency from PRACTICAL Oncoarray samples of Japanese ancestry

<sup>§</sup> Rectal bleeding was not assessed in NTMC or PRRG

<sup>||</sup> 82 out of 262 individuals in NTMC, 5 out of 170 individuals in PRRG-photon, and 11 out of 538 individuals in PRRG-Cion developed grade 2+ decreased urinary stream.

<sup>¶</sup> 16 out of 538 individuals in PRRG-Cion developed grade 2+ hematuria.

<sup>#</sup> Hematuria was not assessed in NTMC.

<sup>\*\*</sup> No individuals in PRRG-photon reported grade 2 or worse toxicity and so this outcome was not analyzed.



<sup>††</sup> 75 out of 198 individuals in NTMC, 35 out of 98 individuals in PRRG-photon, and 49 out of 414 individuals in PRRG-Cion developed grade 1+ increased urinary frequency at 2 years after radiotherapy.

<sup>‡‡</sup> 58 out of 180 individuals in NTMC developed grade 1+ decreased urinary stream at 2 years after radiotherapy.

<sup>§§</sup> Only 2 individuals in PRRG-photon and no individuals in PRRG-Cion developed grade 1+ decreased urinary stream at 2 years after radiotherapy and so this outcome was not analyzed.

<sup>|||</sup> SNP is monomorphic in the Japanese population and was not analyzable in NTMC or PRRG.

<sup>¶¶</sup> Overall toxicity was measured using STAT score [26] and dichotomized by comparing those individuals with a STAT score greater than or equal to one standard deviation above the mean to individuals with a STAT score less than one standard deviation above the mean.

**Supplementary Table 10. C-statistics representing model performance comparing models with only clinical factors to models including clinical factors and SNPs**

| <b>Toxicity outcome</b>     | <b>C-statistic</b>                 |                                               |
|-----------------------------|------------------------------------|-----------------------------------------------|
|                             | <b>Model only clinical factors</b> | <b>Model with clinical factors and SNP(s)</b> |
| Increased urinary frequency | 0.563                              | 0.567                                         |
| Decreased urinary stream    | 0.561                              | 0.575                                         |
| Hematuria                   | 0.578                              | 0.617                                         |
| Rectal bleeding             | 0.603                              | 0.621                                         |

## Supplementary Figures

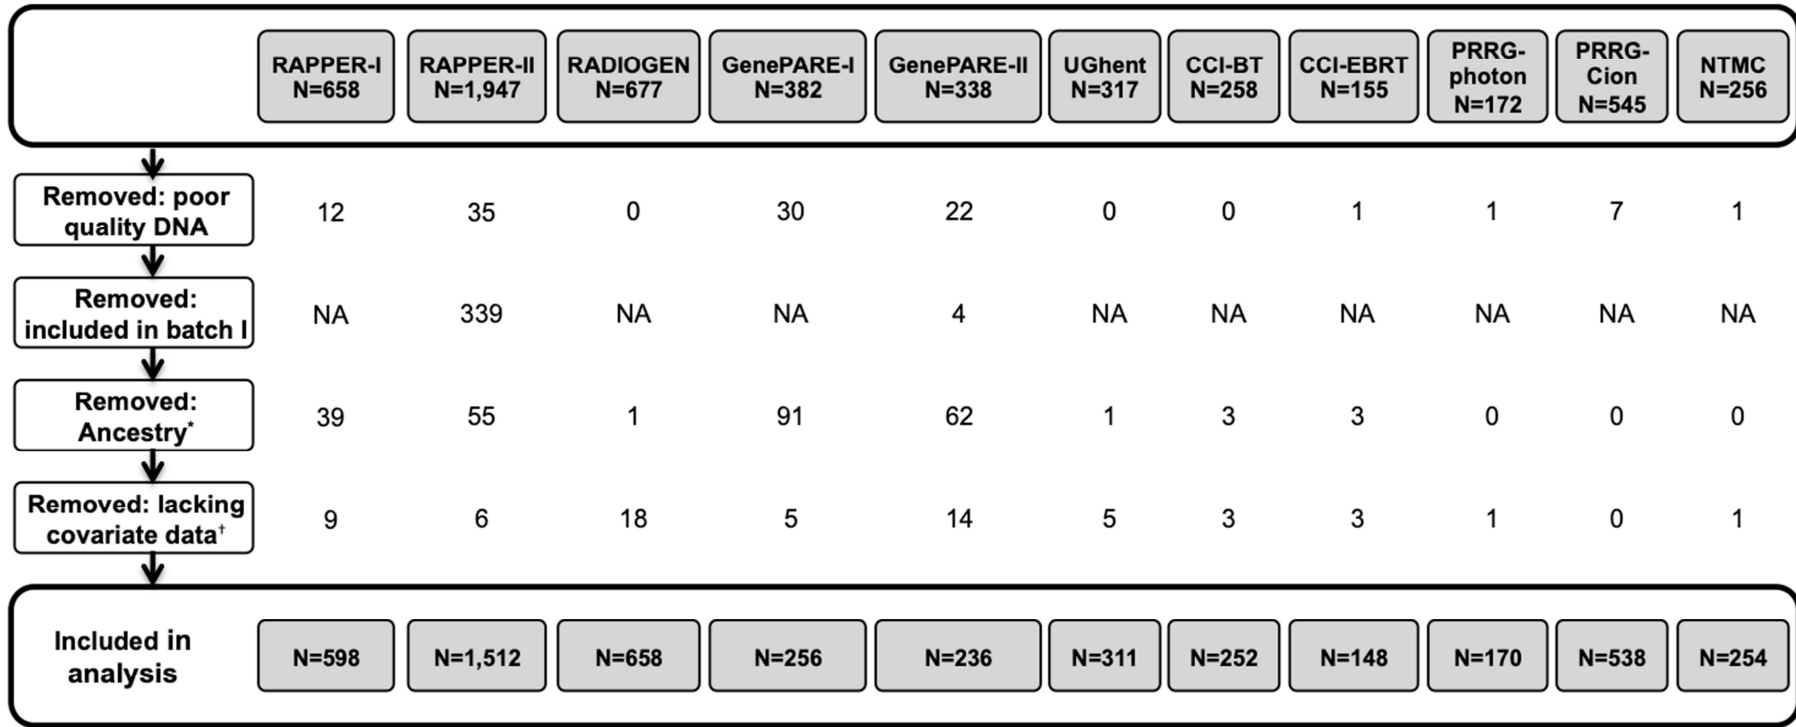

**Supplementary Figure 1. Study participants.** N=4,833 included in analysis (N=3,871 from European cohorts; N=962 from Japanese cohorts).

\* Non-European ancestry samples were removed from RAPPER, RADIOGEN, GenePARE, UGhent, CCI-BT and CCI-EBRT. Non-Japanese ancestry samples were removed from NTMC and PRRG. Abbreviations: NA, not applicable.

† Covariates included in the GWAS meta-analysis are age, total BED, prior prostatectomy, and receipt of androgen deprivation therapy.

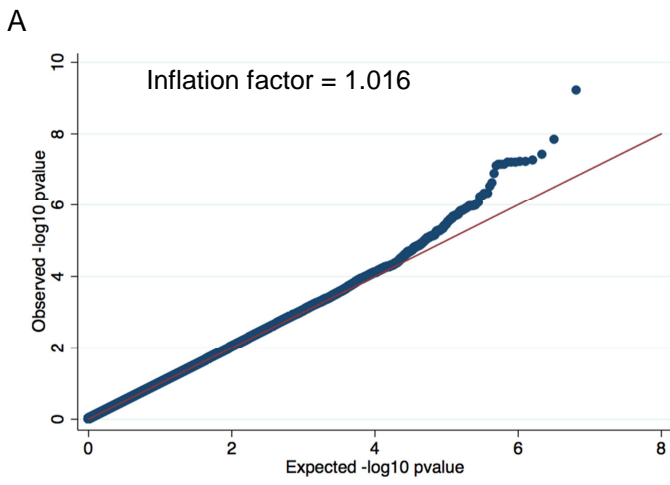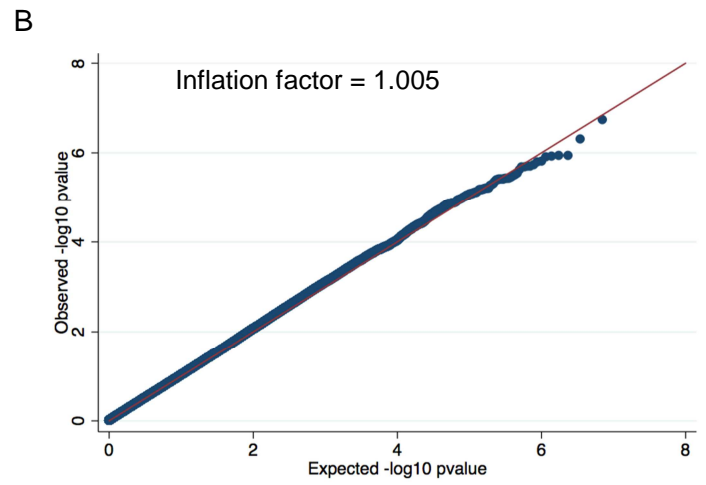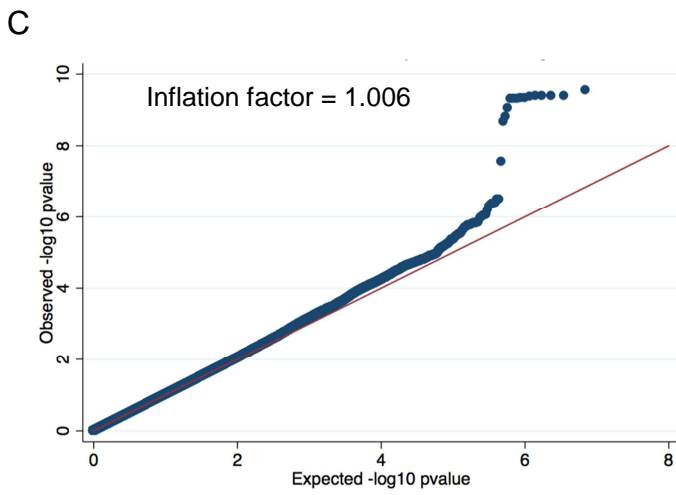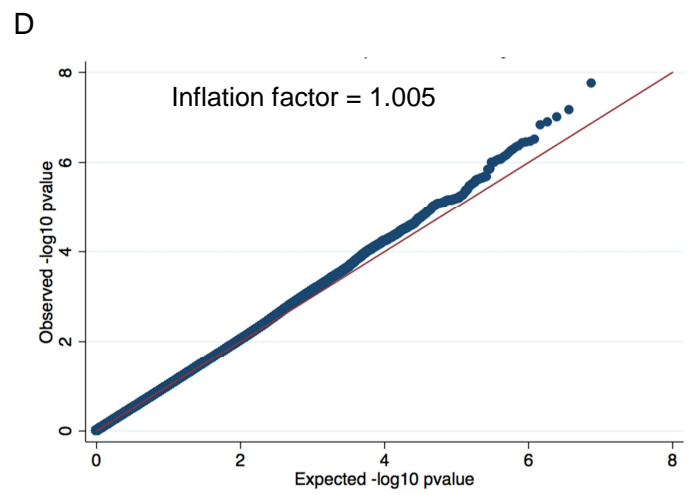

**Supplementary Figure 2.** QQ plots. The plots show expected and observed p-values from GWAS meta-analysis of rectal bleeding (A), increased urinary frequency (B), decreased urinary stream (C), and hematuria (D).
